# Supplementary material for: Economic evaluations of scaling up strategies of evidence-based health interventions: a systematic review protocol
Source: PubMed Central journal article supplement — BMJ Open. 2021 Sep 30;11(9):e050838. doi: 10.1136/bmjopen-2021-050838 (PMC8487175; doi:10.1136/bmjopen-2021-050838), 2021-09-30
Supplement: bmjopen-2021-050838.draft_revisions.pdf [file bmjopen-2021-050838.draft_revisions.pdf]

# BMJ Open

BMJ Open is committed to open peer review. As part of this commitment we make the peer review history of every article we publish publicly available.

When an article is published we post the peer reviewers' comments and the authors' responses online. We also post the versions of the paper that were used during peer review. These are the versions that the peer review comments apply to.

The versions of the paper that follow are the versions that were submitted during the peer review process. They are not the versions of record or the final published versions. They should not be cited or distributed as the published version of this manuscript.

BMJ Open is an open access journal and the full, final, typeset and author-corrected version of record of the manuscript is available on our site with no access controls, subscription charges or pay-per-view fees (<http://bmjopen.bmj.com>).

If you have any questions on BMJ Open's open peer review process please email [info.bmjopen@bmj.com](mailto:info.bmjopen@bmj.com)

# BMJ Open

## Economic evaluations of scaling up strategies of evidence-based HEALTH interventions: a systematic review Protocol

|                               |                                                                                                                                                                                                                                                                                                                                                                                                                                                                                                                                                                                                                                                                                                                                                                                                                                                                                                                                                                                                                                                                                                                                                                                                                                                                                                                                                                                                                                                                                                                                                                                                                                                                                                                                                                                                                                                                                                                                                                                                                                                                                                  |
|-------------------------------|--------------------------------------------------------------------------------------------------------------------------------------------------------------------------------------------------------------------------------------------------------------------------------------------------------------------------------------------------------------------------------------------------------------------------------------------------------------------------------------------------------------------------------------------------------------------------------------------------------------------------------------------------------------------------------------------------------------------------------------------------------------------------------------------------------------------------------------------------------------------------------------------------------------------------------------------------------------------------------------------------------------------------------------------------------------------------------------------------------------------------------------------------------------------------------------------------------------------------------------------------------------------------------------------------------------------------------------------------------------------------------------------------------------------------------------------------------------------------------------------------------------------------------------------------------------------------------------------------------------------------------------------------------------------------------------------------------------------------------------------------------------------------------------------------------------------------------------------------------------------------------------------------------------------------------------------------------------------------------------------------------------------------------------------------------------------------------------------------|
| Journal:                      | <i>BMJ Open</i>                                                                                                                                                                                                                                                                                                                                                                                                                                                                                                                                                                                                                                                                                                                                                                                                                                                                                                                                                                                                                                                                                                                                                                                                                                                                                                                                                                                                                                                                                                                                                                                                                                                                                                                                                                                                                                                                                                                                                                                                                                                                                  |
| Manuscript ID                 | bmjopen-2021-050838                                                                                                                                                                                                                                                                                                                                                                                                                                                                                                                                                                                                                                                                                                                                                                                                                                                                                                                                                                                                                                                                                                                                                                                                                                                                                                                                                                                                                                                                                                                                                                                                                                                                                                                                                                                                                                                                                                                                                                                                                                                                              |
| Article Type:                 | Protocol                                                                                                                                                                                                                                                                                                                                                                                                                                                                                                                                                                                                                                                                                                                                                                                                                                                                                                                                                                                                                                                                                                                                                                                                                                                                                                                                                                                                                                                                                                                                                                                                                                                                                                                                                                                                                                                                                                                                                                                                                                                                                         |
| Date Submitted by the Author: | 07-Mar-2021                                                                                                                                                                                                                                                                                                                                                                                                                                                                                                                                                                                                                                                                                                                                                                                                                                                                                                                                                                                                                                                                                                                                                                                                                                                                                                                                                                                                                                                                                                                                                                                                                                                                                                                                                                                                                                                                                                                                                                                                                                                                                      |
| Complete List of Authors:     | <p>Brundisini, Francesca; CIUSSS de la Capitale-Nationale, Knowledge Translation and Implementation component of the Quebec SPOR-SUPPORT Unit; Université Laval, Département d'opérations et systèmes de décision</p> <p>Zomahoun, Hervé Tchala Vignon; CIUSSS de la Capitale-Nationale, Knowledge Translation and Implementation component of the Quebec SPOR-SUPPORT Unit; Université Laval, Department of Family Medicine and Emergency Medicine</p> <p>Légaré, France; Université Laval, Department of Family Medicine and Emergency Medicine; CIUSSS de la Capitale-Nationale, VITAM Centre de recherche sur la santé durable</p> <p>Nathalie, Rheault; CIUSSS de la Capitale-Nationale, Knowledge Translation and Implementation component of the Quebec SPOR-SUPPORT Unit; CIUSSS de la Capitale-Nationale, VITAM Centre de recherche sur la santé durable</p> <p>Bernard-Uwizeye, Claude; CIUSSS de la Capitale-Nationale, Knowledge Translation and Implementation component of the Quebec SPOR-SUPPORT Unit; CIUSSS de la Capitale-Nationale, VITAM Centre de recherche sur la santé durable</p> <p>Massougbdji, José; CIUSSS de la Capitale-Nationale, Knowledge Translation and Implementation component of the Quebec SPOR-SUPPORT Unit; Université Laval, Department of Family Medicine and Emergency Medicine</p> <p>Gogovor, Amédé; CIUSSS de la Capitale-Nationale, Knowledge Translation and Implementation component of the Quebec SPOR-SUPPORT Unit; Université Laval, Department of Family Medicine and Emergency Medicine</p> <p>Tchoubi, Sébastien; CIUSSS de la Capitale-Nationale, Knowledge Translation and Implementation component of the Quebec SPOR-SUPPORT Unit; Université Laval, Department of Family Medicine and Emergency Medicine</p> <p>Assan, Odilon; CIUSSS de la Capitale-Nationale, Knowledge Translation and Implementation component of the Quebec SPOR-SUPPORT Unit; Université Laval</p> <p>Laberge, Maude; Université Laval, Operations and Decision Systems; CIUSSS de la Capitale-Nationale, VITAM Centre de recherche sur la santé durable</p> |
| Keywords:                     | HEALTH ECONOMICS, HEALTH SERVICES ADMINISTRATION & MANAGEMENT, Protocols & guidelines < HEALTH SERVICES ADMINISTRATION & MANAGEMENT                                                                                                                                                                                                                                                                                                                                                                                                                                                                                                                                                                                                                                                                                                                                                                                                                                                                                                                                                                                                                                                                                                                                                                                                                                                                                                                                                                                                                                                                                                                                                                                                                                                                                                                                                                                                                                                                                                                                                              |

1  
2  
3  
4  
5  
6  
7  
8  
9  
10  
11  
12  
13  
14  
15  
16  
17  
18  
19  
20  
21  
22  
23  
24  
25  
26  
27  
28  
29  
30  
31  
32  
33  
34  
35  
36  
37  
38  
39  
40  
41  
42  
43  
44  
45  
46  
47  
48  
49  
50  
51  
52  
53  
54  
55  
56  
57  
58  
59  
60

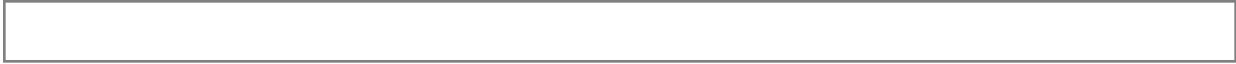

SCHOLARONE™  
Manuscripts

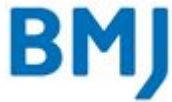

I, the Submitting Author has the right to grant and does grant on behalf of all authors of the Work (as defined in the below author licence), an exclusive licence and/or a non-exclusive licence for contributions from authors who are: i) UK Crown employees; ii) where BMJ has agreed a CC-BY licence shall apply, and/or iii) in accordance with the terms applicable for US Federal Government officers or employees acting as part of their official duties; on a worldwide, perpetual, irrevocable, royalty-free basis to BMJ Publishing Group Ltd ("BMJ") its licensees and where the relevant Journal is co-owned by BMJ to the co-owners of the Journal, to publish the Work in this journal and any other BMJ products and to exploit all rights, as set out in our [licence](#).

The Submitting Author accepts and understands that any supply made under these terms is made by BMJ to the Submitting Author unless you are acting as an employee on behalf of your employer or a postgraduate student of an affiliated institution which is paying any applicable article publishing charge ("APC") for Open Access articles. Where the Submitting Author wishes to make the Work available on an Open Access basis (and intends to pay the relevant APC), the terms of reuse of such Open Access shall be governed by a Creative Commons licence – details of these licences and which [Creative Commons](#) licence will apply to this Work are set out in our licence referred to above.

Other than as permitted in any relevant BMJ Author's Self Archiving Policies, I confirm this Work has not been accepted for publication elsewhere, is not being considered for publication elsewhere and does not duplicate material already published. I confirm all authors consent to publication of this Work and authorise the granting of this licence.

Economic evaluations of scaling up strategies of evidence-based health interventions: a systematic review protocol

## ECONOMIC EVALUATIONS OF SCALING UP STRATEGIES OF EVIDENCE-BASED HEALTH INTERVENTIONS: A SYSTEMATIC REVIEW PROTOCOL

### Corresponding author : Maude Laberge

Département d'opérations et systèmes de décision, Faculté des sciences de l'administration, Université

Laval

2325, rue de la Terrasse, bureau 2519, Québec, G1V 0A6

Tel. +1 418 656 2131, poste 407670

Fax. +1 418 656 2624

[maude.laberge@fsa.ulaval.ca](mailto:maude.laberge@fsa.ulaval.ca)

### List of authors

- Francesca Brundisini<sup>1,4,5,7</sup> [francesca-katherine.brundisini.1@ulaval.ca](mailto:francesca-katherine.brundisini.1@ulaval.ca)
- Hervé Tchala Vignon Zomahoun<sup>1,3,5,7,9</sup> [herve.zomahoun.ciuussscn@ssss.gouv.qc.ca](mailto:herve.zomahoun.ciuussscn@ssss.gouv.qc.ca)
- France Légaré<sup>2,3,5,6,7</sup> [france.legare@mfa.ulaval.ca](mailto:france.legare@mfa.ulaval.ca)
- Nathalie Rheault<sup>1,5,7</sup> [nathalie.rheault.ciuussscn@ssss.gouv.qc.ca](mailto:nathalie.rheault.ciuussscn@ssss.gouv.qc.ca)
- Claude Bernard-Uwizeye<sup>1,5,7</sup> [claud.bernard-uwizeye.ciuussscn@ssss.gouv.qc.ca](mailto:claud.bernard-uwizeye.ciuussscn@ssss.gouv.qc.ca)
- José Massougbodji<sup>1,3,5,7</sup> [jose.massougbodji.ciuussscn@ssss.gouv.qc.ca](mailto:jose.massougbodji.ciuussscn@ssss.gouv.qc.ca)
- Amédé Gogovor<sup>1,2,3,5,7</sup> [amede.gogovor.1@ulaval.ca](mailto:amede.gogovor.1@ulaval.ca)
- Sébastien Tchoubi<sup>1,3</sup> [sebastien.tchoubi.1@ulaval.ca](mailto:sebastien.tchoubi.1@ulaval.ca)
- Odilon Assan<sup>1,5,8</sup> [odilon.assan.1@ulaval.ca](mailto:odilon.assan.1@ulaval.ca)
- Maude Laberge<sup>4,5,6,7</sup> [maude.laberge@fsa.ulaval.ca](mailto:maude.laberge@fsa.ulaval.ca)

Economic evaluations of scaling up strategies of evidence-based health interventions: a systematic review protocol

### List of affiliations

1. Health and Social Services Systems, Knowledge Translation and Implementation component of the Quebec SPOR-SUPPORT Unit, Quebec, Quebec, Canada
2. Tier 1 Canada Research Chair in Shared Decision Making and Knowledge Translation, Université Laval, Quebec, Quebec, Canada
3. Department of Family Medicine and Emergency Medicine, Université Laval, Quebec, Quebec, Canada
4. Département d'opérations et systèmes de décision, Faculté des sciences de l'administration, Université Laval, Quebec, Quebec, Canada
5. VITAM Centre de recherche sur la santé durable, CIUSSS de la Capitale Nationale, Quebec, Canada
6. Centre de recherche du CHU de Québec-Université Laval, Université Laval, Quebec, Quebec, Canada
7. Centre intégré universitaire de santé et de services sociaux de la Capitale-Nationale (CIUSSS-CN), Quebec, Quebec, Canada
8. Faculty of Pharmacy, Université Laval, Quebec, Quebec, Canada
9. Faculty of Medicine, School of Physical and Occupational Therapy, Epidemiology, Biostatistics, and Occupational Health, McGill University, Montreal, Quebec, Canada.

Word count: 3954 words

Economic evaluations of scaling up strategies of evidence-based health interventions: a systematic review protocol

## ABSTRACT

Introduction: Scaling up strategies can help roll out evidence-based health interventions on a wide scale to benefit more individuals. Yet, little is known on how to evaluate economic aspects of these strategies. We seek then to identify and describe the methods and issues related to economic evaluations assessing scaling up strategies of evidence-based health interventions.

Methods and analysis: Using the Joanna Briggs Institute guidance on systematic reviews, we will conduct a systematic review of characteristics and methods applied in economic evaluations in scaling up science.

To be eligible for inclusion, studies must include a scaling up strategy of an evidence-based health intervention delivered and received by any individual or organization in any country and setting. They must report costs and cost-effectiveness outcomes. We will consider full or partial economic evaluations, modelling, and methodological studies. We searched peer-reviewed publications in Medline, Web of Science, Embase, Cochrane Library Database, PEDE, EconLIT, INHATA from their inception onwards. We will search grey literature from international organizations, bilateral agencies, nongovernmental organizations, consultancy firms websites and region-specific databases. Two independent reviewers will screen the records against the eligibility criteria and extract data using a pretested extraction form. We will extract data on study characteristics, scaling up strategies, economic evaluation methods and their components. We will appraise the methodological quality of included studies using the BMJ Checklist. We will narratively summarize the studies' descriptive characteristics, methodological strengths/weaknesses, and the main drivers of cost-effectiveness outcomes. This study will help identify what are the trade-offs of scaling up evidence-based interventions to allocate resources efficiently.

Ethics and dissemination: No ethics approval is required as no primary data will be collected. The results will be published in a peer-reviewed, international journal and presented at national and international conferences.

1 Economic evaluations of scaling up strategies of evidence-based health interventions: a systematic review  
2 protocol

3 **KEYWORDS:** Scaling up, Spread, Economic evaluations, Evidence-based health interventions, Systematic  
4 review, Protocol  
5  
6  
7  
8  
9

10 **Open Access Framework registration number** [osf.io/fsq84](https://osf.io/fsq84)  
11  
12  
13  
14  
15  
16  
17  
18  
19  
20  
21  
22  
23  
24  
25  
26  
27  
28  
29  
30  
31  
32  
33  
34  
35  
36  
37  
38  
39  
40  
41  
42  
43  
44  
45  
46  
47  
48  
49  
50  
51  
52  
53  
54  
55  
56  
57  
58  
59  
60

For peer review only



Economic evaluations of scaling up strategies of evidence-based health interventions: a systematic review protocol

### Strengths and limitations of this study

- This systematic review will be the first, to the best of our knowledge, to systematically summarize approaches used for economic evaluations of scaling up strategies of evidence-based interventions in health.
- This review will assess the completeness of reporting practices in economic evaluations of scaling up strategies of evidence-based interventions in health and will identify areas for improvement in the field.
- It is expected that a great heterogeneity of studies will be included due to the different types of evidence-based interventions in health, scaling up strategies, targeted populations, and economic evaluation approaches.
- The review may face some limitations to generalizability due to the highly context-specific nature of cost-effectiveness evaluations.

Economic evaluations of scaling up strategies of evidence-based health interventions: a systematic review protocol

## INTRODUCTION

Researchers, healthcare professionals and decision-makers are increasingly focusing on filling the gap between knowledge and practice. In recent years, growing efforts to bridge this gap have produced a vast body of knowledge on the efficacy and effectiveness of health interventions and their implementation in practice.<sup>1-3</sup> Most of this evidence derives from experimental studies in which interventions are delivered under optimal, or at least "best practice" conditions, generally conducted on relatively small populations and from projects done in given settings. To date, these efforts have produced a wide set of well-documented effective health interventions.<sup>1 2 4 5</sup> However, health decision-makers are still not systematically implementing such evidence to benefit more people on a wider scale.<sup>1 2 4-8</sup> One way to fill this gap is to develop and implement strategies to scale up effective evidence-based interventions in health (EBIs).<sup>7 9</sup>

While both efficacy and effectiveness are key to the roll out of EBIs on a large scale, other factors – such as costs and cost-effectiveness – are central to the successful scale up of EBIs.<sup>8 10-14</sup> As health systems face continuous strains and limited resource availability, economic evaluations can play an important role in informing health decision-makers on the trade-offs in costs health benefits of choosing and defining a scaling up strategy.<sup>10 12 14-21</sup> Economic evaluations are a means to both assess the value for money and inform resource allocation decision-making.<sup>22</sup> To do so, economic evaluations compare alternative choices in terms of both costs and consequences.<sup>22</sup> Alternative choices refer to the different ways in which healthcare resources can be used to improve health. The type of economic evaluations are generally defined by the number of alternatives compared, whether both costs and consequences are examined, and how the consequences are expressed.<sup>22</sup>

Little is known on what these evaluations should include to analyze the cost-effectiveness of scaling up strategies, as the cost-effectiveness of EBIs does not necessarily reflect the cost-effectiveness of the scaling up effort.<sup>8 13 15-19 21 23</sup> While not many, a small number of studies synthesized the costs and cost-effectiveness of scaling up strategies of EBIs in health. Mostly conducted in Low and Middle Income Countries (LMICs), these reviews show that included studies generally focus, among other interventions, on national

Economic evaluations of scaling up strategies of evidence-based health interventions: a systematic review protocol

immunization programs,<sup>21 24 25</sup> maternal, infant and children health programs,<sup>20</sup> and HIV/AIDS prevention and care interventions.<sup>16 26</sup> Despite being conducted in specific geographical areas and having a narrow focus on scaling up strategies of certain health interventions, these reviews provide insights into the economic evaluation research production of scaling up strategies. These reviews reveal a great variability among the included economic evaluation studies. When included, these studies vary in perspectives, scope, approaches, assumptions, cost categories, and are often not presented in a way that can be easily comparable and generalized across settings and countries.<sup>19-21 26-28</sup>

Oftentimes, the lack of complete availability of scaling up cost data or the use of models leads economic analysts to rely on assumptions that may not reflect the complexity of implementing scaling up strategies.<sup>8</sup>  
<sup>16-19 21 26 29 30</sup> For example, economic evaluations may posit that scaling-up implementation costs are a fixed part of the intervention costs.<sup>19 30 31</sup> In reality, scaling up strategies may present additional costs to that of the intervention that can greatly vary across interventions and settings, potentially leading to both economies and/or diseconomies of scale.<sup>29</sup> Costs and cost-effectiveness estimates may change according to the type of intervention being expanded, the size of the targeted population, the prevalence/incidence of the disease, the relevant efficacy level of the intervention, the geography, and the financial resources available and needed.<sup>8 13 15-17 19 29 32</sup> Additionally, costs and estimates related to infrastructure and available human resources can vary based on the different scaling up strategy operationalization and management, the cost impacts of change, including the excess cost of service delivery as uptake changes and the opportunity costs to providers and patients participating in the activities.<sup>8 13 15-17 19 29 32</sup> This variability then results in a wide heterogeneity of studies and approaches when it comes to economically evaluating scaling up strategies. Costs and cost-effectiveness estimates may also vary according to different modelling approaches. For example, ex-ante economic evaluations are often used for informing pre-implementation decision-making using available evidence and modelling to simulate the costs and consequences of alternatives.<sup>15</sup>

We argue then that, little is known on how to evaluate the economic aspects of these strategies to understand what constitutes the trade-offs of scaling up evidence-based interventions to allocate resources efficiently.

Economic evaluations of scaling up strategies of evidence-based health interventions: a systematic review protocol

Thus, we seek to identify and describe the methods and issues related to economic evaluations aimed at assessing scaling up strategies of evidence-based interventions (EBIs) in health.

## Objectives

Our goals are to:

- Identify and describe which economic evaluations methods are used to assess scaling up strategies of EBIs in health.
- Identify and describe the costs and cost elements adopted in such economic evaluations.
- Identify and describe environmental factors accounted for in such economic evaluations.
- Discuss the strengths and limitations of each approach and explain reasons for variation in the reporting of economic evaluations of scaling up strategies of EBIs in health.

## METHODS

### Study design

We are conducting a systematic review following Joanna Briggs Institute (JBI) guidance for conducting systematic review of evidence from all (i.e. partial and full) economic evaluations addressing a question(s) about scaling up health intervention strategies' cost-effectiveness.<sup>33 34</sup> We adopted PRISMA-P guidelines for reporting of systematic reviews protocols.<sup>35</sup> (Online supplementary additional file 1). We registered the protocol on Open Science Framework database (registration number [osf.io/fsq84](https://osf.io/fsq84) ).

### Eligibility criteria

Studies included in the review must adhere to the eligibility criteria described below following the PICOS as outlined in the PRISMA-P guidelines:<sup>35</sup>

Population: We will include studies in which the population of interest is any individual, organization, or system – directly or indirectly – involved in the delivery or receipt of any health services that was the target of the scale-up.

Economic evaluations of scaling up strategies of evidence-based health interventions: a systematic review protocol

Intervention: We will include research studies that investigate strategies for scaling up. Included studies must evaluate a scaling up strategy of an EBI (and not the evidence-based health intervention itself). For the purposes of this systematic review, we consider:

- a health intervention to be a health service or a package of health services aimed at improving, maintaining, promoting, or restoring health;<sup>36 37</sup>
- evidence-based interventions (EBIs) in health as health interventions that are effective, efficacious, and ready for dissemination;<sup>38</sup>
- a strategy as one or more initiatives, approaches, or activities that directly aim to change the supply or demand of EBIs in health to improve reach, adoption, and sustainability of an EBI;
- scaling up in healthcare as the "deliberate efforts to increase the impact of successfully tested health interventions so as to benefit more people and to foster policy and program development on a lasting basis." <sup>12 39 40</sup> In other words, scaling up strategies are systematic courses of action that aim to roll out successful local health interventions to regional, national, or international levels to reach broader populations and settings over time.<sup>39 40</sup>

No restrictions will be made on the type of EBI or impact (effectiveness) metric chosen. The scaling up of an EBI can be implemented as a standalone intervention, or as an addition in combination with other interventions.

Comparator: There are no restrictions on the type of comparator. Included studies may report economic evaluations that compare the studied scaling up strategy to current practice (i.e., no scaling up), or to alternative scaling up strategies.

Outcomes: All reported partial or full economic evaluation outcomes are of interest. Outcomes will include measures related to costs and cost-effectiveness. Partial evaluations focused only on costs will include cost outcomes reported as monetary amounts. Full economic evaluations cost-effectiveness outcomes will include incremental cost-effectiveness ratio (ICER), incremental cost-utility ratio (ICUR), net benefit, cost-

Economic evaluations of scaling up strategies of evidence-based health interventions: a systematic review protocol

benefit ratio. The metric chosen to report the health gain (effectiveness) used in the economic evaluations will not be an inclusion criterion. It can include (but not restricted to) for instance cost/illness averted, cost/quality-adjusted life year (QALY) gained, or cost/disability-adjusted life year (DALY) averted. All viewpoints/analytic perspectives will be considered with no restrictions. We expect that a variety of outcomes are used in studies to report on the cost-effectiveness of scaling up EBIs. Studies in which only scaling up strategy's effectiveness, adoption, or health gain was reported will not be included.

Study design: Any study design that includes any type of empirical economic evaluation, as well as any modelling and methodological considerations will be included. We will include both full economic evaluation designs, such as cost-effectiveness analysis (CEA), cost-utility analysis (CUA) and cost-benefit analysis (CBA), and partial economic evaluation designs, such as cost minimization analysis (CMA), cost comparison/cost analysis, cost outcome descriptions, cost descriptions, and budget impact analysis. Additionally, included modelling studies can be based on a meta-analysis of data from randomised trials or using secondary data from literature and those based on observational studies or analysis of large administrative databases. Both published and unpublished grey literature will be included. We will exclude the following studies: reviews, systematic reviews, qualitative studies, clinical effectiveness studies, critical reviews, editorials, commentaries, abstracts, protocols, academic theses.

Settings: We will review studies independently of the settings, thus, including any healthcare setting (i.e., public health, primary care clinic, hospital, etc.) in both rural and urban areas. We will not restrict the inclusion criteria based on geography. Economic evaluations undertaken within any country context will be included.

### **Information sources**

The information sources include a search of the following electronic bibliographic databases from their inception onwards: Medline, Web of Science, Embase, Cochrane Library Database, PEDE, EconLIT, INHATA. Additionally, since economic evaluation studies are often conducted for the government or by

Economic evaluations of scaling up strategies of evidence-based health interventions: a systematic review protocol

government agencies, we will systematically perform an internet search as this has been shown to regularly capture eligible studies not identified by other databases.<sup>25</sup> We will perform an extensive search strategy using free text, with no restrictions on date and year of publication. A search of web pages of international organizations, bilateral agencies, nongovernmental organizations (NGOs), and consultancy firms involved in the delivery, funding or evaluation of scaling up EBIs. Reports found to have a matching publication in the published literature will be excluded. We will search the following Internet search databases and data sources: Google, Google Scholar, INESSS (Institut national d'excellence en santé et en services sociaux), OpenGrey, Grey Literature Report, GreyNet, Canadian Evaluation Society, EuroScan, databases included in the "Grey Matters – A Practical Deep web Search Tool for Evidence based Medicine" (CADTH) Checklist, and region-specific databases (African Index Medicus, Eastern Mediterranean Literature (WHO), Index Medicus for South-East Asia Region, LILACS for Latin America). We will then conduct a webpage search of following organizations/agency/governmental websites: UNICEF, World Health Organization, GAVI Alliance, Program for Appropriate Technology in Health (PATH), Johns Hopkins School of Public Health, World Bank, Global Affairs Canada, UK Department for International Development, and United States Agency for International Development.

The search will include a combination of the following three concepts: 1) scaling up, 2) intervention, and 3) cost-effectiveness analysis basic terms: (scaling up OR uptake) AND (intervention OR innovation) AND (cost OR cost-effectiveness OR cost benefit analysis OR cost-utility analysis). No language restrictions will be applied.

### **Search strategy**

Our information specialist (NR) developed a Medline strategy with input from the project team. An iterative process of revision was conducted by the members of the research team. Comments will be integrated for a final version of the search strategy. This final version was approved by the team members. Once validated, the information specialist (NR) translated this search strategy for each electronic database mentioned above. The present protocol only includes the search strategy conducted in Medline on October, 14<sup>th</sup> 2020 (see

1 Economic evaluations of scaling up strategies of evidence-based health interventions: a systematic review  
2 protocol

3 online supplementary file 2). A hand search will also be performed, and citations and bibliographies of  
4 included primary studies and relevant literature reviews will be reviewed for additional relevant articles.  
5  
6  
7

## 8 9 **Study records**

### 10 11 **Data management**

12  
13  
14  
15 In this ongoing study, we exported all citations identified from the electronic databases into Endnote X9  
16 (citation manager software). We used EndNote X9 to remove duplicates in addition to manual checking to  
17 identify unique citations for the study selection process. Unique records were then exported into Covidence  
18 (internet-based screening and data extraction tool).  
19  
20  
21  
22

### 23 24 **Selection process**

25  
26  
27 All stages of the selection process will be performed independently by two reviewers. One reviewer (FB)  
28 developed and tested (after team validation) together with the second reviewer a pilot screening form against  
29 the eligibility criteria on a 7.5% random sample of the retrieved citations (title and abstracts) to validate the  
30 process of inclusion of articles in the review. This piloting stage ensured reviewers shared a common  
31 understanding of the eligibility criteria. At the title and abstract stage, the reviewers will independently  
32 screen the titles and abstracts with regard to the inclusion/exclusion criteria using Covidence. Studies not  
33 fulfilling the eligibility criteria will be excluded, and the full texts of the remaining studies will be retrieved  
34 for further assessment. Articles with abstracts that do not appear to meet the criteria for exclusion or are  
35 ambiguous, or that have a missing abstract, will be retained and reviewed in full. The full text of retained  
36 studies will be independently assessed for exclusion against inclusion/exclusion criteria by both reviewers.  
37  
38  
39 To resolve eligibility questions, we will contact the authors of the included studies to seek additional  
40 information. Discrepancies between reviewers will be solved through discussion, and – if needed – a  
41 consultation with a third reviewer. Any reasons for exclusion will be recorded in Covidence at the full text  
42  
43  
44  
45  
46  
47  
48  
49  
50  
51  
52  
53  
54  
55  
56  
57  
58  
59  
60



Economic evaluations of scaling up strategies of evidence-based health interventions: a systematic review protocol

stage. The results of the identification, screening and inclusion process will be displayed using the PRISMA flowchart.<sup>35</sup>

#### Data collection process

A standardized data extraction template form will be piloted in duplicate by the reviewers. The extraction form will be informed by the study objectives, eligibility criteria and the JBI-ACTUARI tool.<sup>33</sup> This template form will allow to extract from each study information on the key characteristics, the results for the outcomes of interest, and the author conclusions.<sup>34</sup> The form will be tested on a 10% random sample of the included studies for data collection. This pilot test will help to identify extraction items that are missing from the template, or likely to be confusing or unnecessary. Authors' consensus will be required before the form can be modified if deemed appropriate. The investigators will use the finalized revised and agreed upon version of the data extraction form to extract data independently.

#### Data items

The data extracted will cover: firstly descriptive data about (i) the study general characteristics (e.g., title, short name, corresponding author name, funding source, conflict of interest), study type (published or grey literature), study population/participants, type of scaled up intervention and authors' description of intervention (including whether it was a standalone intervention or a combination of interventions), type of scaling up strategy (including scaling up level of implementation) and authors' description of strategy, its comparator(s) and outcomes; (ii) study methods including evaluation design type, analytic viewpoint(s), prices and currency used for costing, time period of analysis; sensitivity testing; source of effectiveness data, measures of resource use, cost and health effect/clinical and cost effectiveness; (iii) study context (geographical, healthcare and broader service delivery setting); secondly reported results for the resource use and/or cost and/or cost effectiveness measures; thirdly, when possible author conclusions about factors that promote and limit the cost-effectiveness of scaling up EBIs strategies.

#### Quality appraisal

1 Economic evaluations of scaling up strategies of evidence-based health interventions: a systematic review  
2 protocol

3 There is still no consensus among health economic experts on which guidelines to follow when conducting  
4 systematic reviews of economic evaluations.<sup>41-44</sup> We will be using Drummond and Jefferson checklist, also  
5 known as the British medical journal (BMJ) checklist, as it was designed for full economic evaluations but  
6 also applicable to partial economic evaluations, report and commentaries on economic evaluations, thus  
7 aligned to our broad inclusion criteria.<sup>45</sup> The BMJ tool is a Yes/No, thirty-five items checklist organized in  
8 three sections: study design, data collection, and analysis and interpretation of results.<sup>45</sup> If items are not  
9 applicable to a specific study, a "not appropriate" (NA) response can be stated. Critical appraisal will be  
10 undertaken independently by two individuals. If any disagreements arise, they will be discussed between  
11 the two reviewers and if need be resolved by team consensus or by a third reviewer.  
12  
13  
14  
15  
16  
17  
18  
19  
20  
21

## 22 **Data synthesis**

23 We will use descriptive structured narratives, statistics, and tables to identify and summarize the key features  
24 of the included economic evaluations of scaling-up strategies and the elements considered in such  
25 evaluations. Narrative synthesis will be used to summarize the methods, highlighting important  
26 characteristics of the studies when relevant, focusing on differences/similarities and methodological  
27 weaknesses, and where possible identifying the main drivers of cost-effectiveness outcomes. In particular,  
28 the synthesis will focus on:  
29  
30  
31  
32  
33  
34  
35  
36  
37

- 38 • The assumed key theoretical trade-offs (between levels and types of resources, and levels and types  
39 of outcome) of scaling up strategies used in the included economic evaluations.
  - 40 • The level and configuration of scaling up resources examined in the economic evaluations, how  
41 they are related to the levels and types of outcomes observed, and the contextual/environmental  
42 factors accounted for in these relationships.
  - 43 • The conclusions regarding the relationship between the cost-effectiveness of the scaling up strategy  
44 under examination and the economic evaluation approach.
  - 45 • Strengths and weaknesses of each approach for evaluating scaling up strategies of EBIs.
- 46  
47  
48  
49  
50  
51  
52  
53  
54  
55  
56  
57

Economic evaluations of scaling up strategies of evidence-based health interventions: a systematic review protocol

We expect to include a plurality of economic evaluation studies assessing scaling up strategies of EBIs with diverse interventions, populations, and settings, thus we anticipate that there will be heterogeneity making difficult to perform a meta-analysis with interpretable results.

### **Patient and Public Involvement**

Patients and the public were not involved in the design of this study.

### **DISCUSSION**

The identification and description of the methods and issues related to the economic evaluations for the scaling up strategies of EBIs in health will help understand what constitutes the trade-offs of scaling up evidence-based interventions to allocate resources efficiently. It will contribute to both health economic evaluation research in scaling science and its implementation in policy and practice. Large-scale health intervention implementation warrants governmental investment, this will also require demonstrable benefits for the patients, providers, and society at large. As our world is currently hitting rock bottom by an unseen pandemic – i.e., Covid-19 – healthcare systems are in more need than ever to understand how to best reduce waste<sup>46</sup> and increase the roll out of what has more benefits than harms at the lowest cost. If deliberate efforts are not taken to efficiently allocate resources on a wide scale, healthcare systems will collapse.

To the best of our knowledge, this will be the first review that will systematically outline and summarize different economic evaluation approaches used in scaling up strategies of EBIs in health. The science of scale is young and has been too often either completely undermined or clustered with that of sustainability.<sup>47</sup> This study will offer a valuable picture of the advancements and gaps in the application of economic evaluation methods in the scaling up science arena. Earlier reviews of economic evaluations considering scaling up strategies were narrower and focused only on scaling up strategies of specific health interventions. This study can help guide future research aimed at defining costing tools and models that can be easily used in scaling up frameworks and plans. It will contribute to define the nature and selection of costs that are integral to the successful roll out of EBIs on large scale, as well as the benefits and

1 Economic evaluations of scaling up strategies of evidence-based health interventions: a systematic review  
2 protocol

3 disadvantages of each economic methodological approaches aimed at evaluating strategies identified in the  
4 literature. As scaling up science is becoming an increasingly relevant area for research, policy, and practice,  
5 improving the standardized reporting of costs and coverage data across studies will advance the quantity  
6 and quality of the information extractable from the evidence to inform both research and practice. We  
7 believe this review will then offer opportunities for improvement in the quality, production, reporting, and  
8 application of health economic evaluative methods to scaling up strategies.  
9  
10  
11  
12  
13  
14  
15

16 Second, we hope that this work will support the use of economic evaluations in policies that aim to  
17 successfully implement EBIs on a large scale. While health economic evaluations are a well-established  
18 component of health technology assessments, their use in implementation science, and in particular scaling  
19 up science, remains limited.<sup>15 32</sup> Yet, unless there are sufficient resources, not all possible scaling up  
20 strategies can be implemented. Health decision-makers need to have a clear, evidence-based understanding  
21 of the financial implications of scaling up EBIs to make an informed choice to use resources efficiently.  
22 Without systematically examining and reporting cost and cost-effectiveness evidence the allocation of  
23 financial resources to scaling up strategies may be too high or too low. Economic evidence is then crucial  
24 for decision makers to design scaling up strategies that are affordable and that represent an efficient use of  
25 current available resources.  
26  
27  
28  
29  
30  
31  
32  
33  
34  
35  
36  
37

38 We plan to use passive and active dissemination strategies to disseminate our findings. First, we will publish  
39 this study's protocol and later the results of this project in leading peer-reviewed journals in health  
40 implementation and services research. We will also share our findings at local, national, and international  
41 conferences addressing audiences interested in implementation science, scaling science, and health  
42 economics. Second, findings from this project will be relevant for health administrators, decision-makers,  
43 health professionals and patients. To reach these audiences, we will use our networks with health  
44 organizations and health research groups (such as the Quebec Strategy for Patient-Oriented Research  
45 (SPOR) Unit). We will tailor the dissemination message to fit each audience and select champions to  
46  
47  
48  
49  
50  
51  
52  
53  
54  
55  
56  
57  
58  
59  
60

Economic evaluations of scaling up strategies of evidence-based health interventions: a systematic review protocol

disseminate our results. Finally, we will use different communication channels, such as newsletters, organization websites, and webinars, to reach all relevant audiences.

Since our research project is a systematic review based on existing primary studies and methodological papers, it will not be necessary to request ethics approval.

**Author contributions:** Members of the executive committee (FB, ML, HTVZ, AG, NR, and FR) contributed to the conception and design. FB drafted the protocol. All authors provided a critical review of the protocol and subsequent versions. All authors read and approved the final protocol.

**Funding statement:** This review is funded by the Quebec Strategy for Patient-Oriented Research (SPOR) - Support for People and Patient-Oriented and Trials (SUPPORT) Unit (Grant number: #SU1-139759). This Unit is supported by the Canadian Institutes of Health Research (CIHR) and provincial partners, including the Ministère de la Santé et des Services sociaux (MSSS) du Québec and the Fonds de recherche du Québec – Santé (FRQ-S). The funders have no role in developing the review protocol.

**Competing interests statement:** None to declare.

**Abbreviations:** EBIs: evidence-based interventions; LMICs: Low and Middle Income Countries; JBI: Joanna Briggs Institute; PRISMA-P: Preferred Reporting Items for Systematic Reviews and Meta-Analyses protocols; CINHAL: Cumulative Index to Nursing and Allied Health Literature; EMBASE: Excerpta Medica dataBASE; MEDLINE: Medical Literature Analysis and Retrieval System Online; PEDE: Paediatric Economic Database Evaluation; INHATA: International Network of Agencies for Health Technology Assessment; INESSS: Institut national d'excellence en santé et en services sociaux; CADTH:

1 Economic evaluations of scaling up strategies of evidence-based health interventions: a systematic review  
2 protocol

3 Canadian Agency for Drugs and Technologies in Health; LILACS: Literatura Latino-Americana e do  
4 Caribe em Ciências da Saúde; PICOS: Population, Intervention, Comparison, Outcomes, Study design;  
5 ICER: incremental cost-effectiveness ratio; ICUR: incremental cost-utility ratio; QALY: quality-adjusted  
6 life year; DALY: disability-adjusted life year; CEA: cost-effectiveness analysis; CUA: cost-utility analysis;  
7 CBA: cost-benefit analysis; CMA: cost minimization analysis; ACTUARI: Analysis of Cost, Technology  
8 and Utilisation Assessment and Review Instrument.  
9  
10  
11  
12  
13  
14  
15  
16  
17  
18  
19  
20  
21  
22  
23  
24  
25  
26  
27  
28  
29  
30  
31  
32  
33  
34

## 35 **References**

- 36  
37  
38  
39  
40 1. Massoud MR DK, McCannon CJ. Options for Large-scale Spread of Simple, High impact Interventions. :  
41  
42 USAID Health Care Improvement Proj. Bethesda, MD: University Research Co, 2010.  
43  
44 2. Eaton J, McCay L, Semrau M, et al. Scale up of services for mental health in low-income and middle-  
45  
46 income countries. *The Lancet* 2011;378(9802):1592-603. doi: 10.1016/s0140-6736(11)60891-x  
47  
48 3. Greenhalgh T, Howick J, Maskrey N. Evidence based medicine: a movement in crisis? *BMJ : British*  
49  
50 *Medical Journal* 2014;348:g3725. doi: 10.1136/bmj.g3725  
51  
52  
53  
54  
55  
56  
57  
58  
59  
60

Economic evaluations of scaling up strategies of evidence-based health interventions: a systematic review protocol

4. Damschroder LJ, Aron DC, Keith RE, et al. Fostering implementation of health services research findings into practice: a consolidated framework for advancing implementation science. *Implementation Science* 2009;4(1):50. doi: 10.1186/1748-5908-4-50
5. Shaw J, Tepper J, Martin D. From pilot project to system solution: innovation, spread and scale for health system leaders. *BMJ Leader* 2018;2(3):87-90. doi: 10.1136/leader-2017-000055
6. Whitworth J, Sewankambo NK, Snewin VA. Improving Implementation: Building Research Capacity in Maternal, Neonatal, and Child Health in Africa. *PLoS Medicine* 2010;7(7):e1000299. doi: 10.1371/journal.pmed.1000299
7. Ben Charif A, Zomahoun HTV, LeBlanc A, et al. Effective strategies for scaling up evidence-based practices in primary care: a systematic review. *Implementation Science* 2017;12(1):139. doi: 10.1186/s13012-017-0672-y
8. Zomahoun HT, Guenette L, Gregoire JP, et al. Effectiveness of motivational interviewing interventions on medication adherence in adults with chronic diseases: a systematic review and meta-analysis. *Int J Epidemiol* 2016 doi: 10.1093/ije/dyw273
9. Kruk ME, Yamey G, Angell SY, et al. Transforming Global Health by Improving the Science of Scale-Up. *PLOS Biology* 2016;14(3):e1002360. doi: 10.1371/journal.pbio.1002360
10. Mangham LJ, Hanson K. Scaling up in international health: what are the key issues? *Health policy and planning* 2010;25(2):85-96. doi: 10.1093/heapol/czp066 [published Online First: 2010/01/15]
11. Organization WH. Scaling up Health Services: Challenges and choices. WHO2008.
12. Simmons R, Fajans P, Ghiron L. Scaling up health service delivery: from pilot innovations to policies and programmes. Geneva: World Health Organization2007.
13. Victora CG, Hanson K, Bryce J, et al. Achieving universal coverage with health interventions. *The Lancet* 2004;364(9444):1541-48. doi: [https://doi.org/10.1016/S0140-6736\(04\)17279-6](https://doi.org/10.1016/S0140-6736(04)17279-6)

Economic evaluations of scaling up strategies of evidence-based health interventions: a systematic review protocol

14. Milat AJ, Newson R, King L. Increasing the scale of population health interventions: A guide. In: Evidence CfEa, ed. North Sydney: NSW Ministry of Health, 2014.
15. Roberts SLE, Healey A, Sevdalis N. Use of health economic evaluation in the implementation and improvement science fields—a systematic literature review. *Implementation Science* 2019;14(1) doi: 10.1186/s13012-019-0901-7
16. Salomon JA. Integrating Economic Evaluation and Implementation Science to Advance the Global HIV Response. *JAIDS Journal of Acquired Immune Deficiency Syndromes* 2019;82:S314-S21. doi: 10.1097/qai.0000000000002219
17. Adam T, Ebener S, Johns B, et al. Capacity utilization and the cost of primary care visits: Implications for the costs of scaling up health interventions. *Cost Effectiveness and Resource Allocation* 2008;6(1):22. doi: 10.1186/1478-7547-6-22
18. Johns B, Baltussen R, Hutubessy R. *Cost Effectiveness and Resource Allocation* 2003;1(1):1. doi: 10.1186/1478-7547-1-1
19. Johns B, Torres TT. Costs of scaling up health interventions: a systematic review. *Health policy and planning* 2005;20(1):1-13. doi: 10.1093/heapol/czi001
20. Carroll G, Safon C, Buccini G, et al. A systematic review of costing studies for implementing and scaling-up breastfeeding interventions: what do we know and what are the gaps? *Health policy and planning* 2020;35(4):461-501. doi: 10.1093/heapol/czaa005
21. Munk C, Portnoy A, Suharlim C, et al. Systematic review of the costs and effectiveness of interventions to increase infant vaccination coverage in low- and middle-income countries. *BMC health services research* 2019;19(1) doi: 10.1186/s12913-019-4468-4
22. Drummond MF, Sculpher MJ, Claxton K, et al. *Methods for the Economic Evaluation of Health Care Programmes*. Oxford, UNITED KINGDOM: Oxford University Press 2015.



Economic evaluations of scaling up strategies of evidence-based health interventions: a systematic review protocol

23. Eisman AB, Kilbourne AM, Dopp AR, et al. Economic evaluation in implementation science: making the business case for implementation strategies. *Psychiatry research* 2020;283:112433.

24. Pegurri E, Fox-Rushby JA, Damian W. The effects and costs of expanding the coverage of immunisation services in developing countries: a systematic literature review. *Vaccine* 2005;23(13):1624-35. doi: <https://doi.org/10.1016/j.vaccine.2004.02.029>

25. Batt K, Fox-Rushby JA, Castillo-Riquelme M. The costs, effects and cost-effectiveness of strategies to increase coverage of routine immunizations in low- and middle-income countries: systematic review of the grey literature. *Bulletin of the World Health Organization* 2004;82(9):689-96.

26. Gomez GB, Borquez A, Case KK, et al. The cost and impact of scaling up pre-exposure prophylaxis for HIV prevention: a systematic review of cost-effectiveness modelling studies. *PLoS Med* 2013;10(3):e1001401. doi: 10.1371/journal.pmed.1001401 [published Online First: 2013/04/05]

27. Vassall A, Compennolle P. Estimating the resource needs of scaling-up HIV/AIDS and tuberculosis interventions in sub-Saharan Africa: A systematic review for national policy makers and planners. *Health Policy* 2006;79(1):1-15. doi: 10.1016/j.healthpol.2005.11.005

28. Marseille E, Jiwani A, Raut A, et al. Scaling up integrated prevention campaigns for global health: costs and cost-effectiveness in 70 countries. *BMJ open* 2014;4(6):e003987. doi: 10.1136/bmjopen-2013-003987 [published Online First: 2014/06/28]

29. Turner HC, Toor J, Hollingsworth TD, et al. Economic Evaluations of Mass Drug Administration: The Importance of Economies of Scale and Scope. *Clinical Infectious Diseases* 2018;66(8):1298-303. doi: 10.1093/cid/cix1001

30. Turner HC, Truscott JE, Fleming FM, et al. Cost-effectiveness of scaling up mass drug administration for the control of soil-transmitted helminths: a comparison of cost function and constant costs analyses. *The Lancet Infectious diseases* 2016;16(7):838-46. doi: 10.1016/s1473-3099(15)00268-6 [published Online First: 2016/02/22]

Economic evaluations of scaling up strategies of evidence-based health interventions: a systematic review protocol

31. Kumaranayake L. The economics of scaling up: cost estimation for HIV/AIDS interventions. *AIDS* 2008;22:S23-S33. doi: 10.1097/01.aids.0000327620.47103.1d
32. Hoomans T, Severens JL. Economic evaluation of implementation strategies in health care. *Implementation Science* 2014;9(1) doi: 10.1186/s13012-014-0168-y
33. Gomersall JS, Jadotte YT, Xue Y, et al. Conducting systematic reviews of economic evaluations. *Int J Evid Based Healthc* 2015;13(3):170-8. doi: 10.1097/xeb.0000000000000063 [published Online First: 2015/08/20]
34. Judith Streak Gomersall YJT, Yifan Xue, Suzi Lockwood, Dru Riddle, Alin Preda. The Systematic Review of Economic Evaluation Evidence. Joanna Briggs Institute Reviewers' Manual: 2014 edition: The Joanna Briggs Institute 2014.
35. Moher D, Shamseer L, Clarke M, et al. Preferred reporting items for systematic review and meta-analysis protocols (PRISMA-P) 2015 statement. *Syst Rev* 2015.
36. Preamble to the Constitution of WHO as adopted by the International Health Conference. In: Organization WH, ed. Official Records of WHO, no 2, p 100. New York, 1946.
37. International Classification of Health Interventions Geneva: World Health Organization.
38. Flay BR, Biglan A, Boruch RF, et al. Standards of evidence: criteria for efficacy, effectiveness and dissemination. *Prev Sci* 2005;6(3):151-75.
39. Milat A, Newson R, King L, et al. A guide to scaling up population health interventions. *Public Health Research & Practice* 2016;26(1) doi: 10.17061/phrp2611604
40. ExpandNet. WHOa. Nine steps for developing a scaling-up strategy. Geneva: WHO, 2010.
41. Jacobsen E, Boyers D, Avenell A. Challenges of Systematic Reviews of Economic Evaluations: A Review of Recent Reviews and an Obesity Case Study. *Pharmacoeconomics* 2020;38(3):259-67. doi: 10.1007/s40273-019-00878-2

Economic evaluations of scaling up strategies of evidence-based health interventions: a systematic review protocol

42. Wijnen B, Van Mastrigt G, Redekop W, et al. How to prepare a systematic review of economic evaluations for informing evidence-based healthcare decisions: data extraction, risk of bias, and transferability (part 3/3). *Expert Review of Pharmacoeconomics & Outcomes Research* 2016;16(6):723-32. doi: 10.1080/14737167.2016.1246961
43. Gerkens S, Crott R, Cleemput I, et al. Comparison of three instruments assessing the quality of economic evaluations: a practical exercise on economic evaluations of the surgical treatment of obesity. *Int J Technol Assess Health Care* 2008;24(3):318-25. doi: 10.1017/s0266462308080422 [published Online First: 2008/07/08]
44. Walker DG WR, Sharma R, et al. Best Practices for Conducting Economic Evaluations in Health Care: A Systematic Review of Quality Assessment Tools. *Rockville (MD): Agency for Healthcare Research and Quality (US)* 2012
45. Drummond MF, Jefferson TO. Guidelines for authors and peer reviewers of economic submissions to the BMJ. *BMJ* 1996;313(7052):275-83. doi: 10.1136/bmj.313.7052.275
46. Moynihan R, Johansson M, Maybee A, et al. Covid-19: an opportunity to reduce unnecessary healthcare. *BMJ* 2020;370:m2752. doi: 10.1136/bmj.m2752
47. Graham ID, Tetroe JM. The knowledge to action framework. *Models and frameworks for implementing evidence-based practice: Linking evidence to action* 2010;207:222.

## PRISMA-P 2015 Checklist

This checklist has been adapted for use with protocol submissions to *Systematic Reviews* from Table 3 in Moher D et al: Preferred reporting items for systematic review and meta-analysis protocols (PRISMA-P) 2015 statement. *Systematic Reviews* 2015 4:1

| Section/topic                     | #  | Checklist item                                                                                                                                                                                  | Information reported                |                          | Page number(s)                                          |
|-----------------------------------|----|-------------------------------------------------------------------------------------------------------------------------------------------------------------------------------------------------|-------------------------------------|--------------------------|---------------------------------------------------------|
|                                   |    |                                                                                                                                                                                                 | Yes                                 | No                       |                                                         |
| <b>ADMINISTRATIVE INFORMATION</b> |    |                                                                                                                                                                                                 |                                     |                          |                                                         |
| <b>Title</b>                      |    |                                                                                                                                                                                                 |                                     |                          |                                                         |
| Identification                    | 1a | Identify the report as a protocol of a systematic review                                                                                                                                        | <input checked="" type="checkbox"/> | <input type="checkbox"/> | 1                                                       |
| Update                            | 1b | If the protocol is for an update of a previous systematic review, identify as such                                                                                                              | <input type="checkbox"/>            | <input type="checkbox"/> | N.a.                                                    |
| <b>Registration</b>               | 2  | If registered, provide the name of the registry (e.g., PROSPERO) and registration number in the Abstract                                                                                        | <input checked="" type="checkbox"/> | <input type="checkbox"/> | Open Access Framework. Registration number osf.io/fsq84 |
| <b>Authors</b>                    |    |                                                                                                                                                                                                 |                                     |                          |                                                         |
| Contact                           | 3a | Provide name, institutional affiliation, and e-mail address of all protocol authors; provide physical mailing address of corresponding author                                                   | <input checked="" type="checkbox"/> | <input type="checkbox"/> | 1                                                       |
| Contributions                     | 3b | Describe contributions of protocol authors and identify the guarantor of the review                                                                                                             | <input checked="" type="checkbox"/> | <input type="checkbox"/> | 10                                                      |
| <b>Amendments</b>                 | 4  | If the protocol represents an amendment of a previously completed or published protocol, identify as such and list changes; otherwise, state plan for documenting important protocol amendments | <input type="checkbox"/>            | <input type="checkbox"/> | N.a.                                                    |
| <b>Support</b>                    |    |                                                                                                                                                                                                 |                                     |                          |                                                         |
| Sources                           | 5a | Indicate sources of financial or other support for the review                                                                                                                                   | <input checked="" type="checkbox"/> | <input type="checkbox"/> | 10                                                      |
| Sponsor                           | 5b | Provide name for the review funder and/or sponsor                                                                                                                                               | <input checked="" type="checkbox"/> | <input type="checkbox"/> | 10                                                      |
| Role of sponsor/funder            | 5c | Describe roles of funder(s), sponsor(s), and/or institution(s), if any, in developing the protocol                                                                                              | <input checked="" type="checkbox"/> | <input type="checkbox"/> | 10                                                      |
| <b>INTRODUCTION</b>               |    |                                                                                                                                                                                                 |                                     |                          |                                                         |
| <b>Rationale</b>                  | 6  | Describe the rationale for the review in the context of what is already known                                                                                                                   | <input checked="" type="checkbox"/> | <input type="checkbox"/> | 4-5                                                     |

| Section/topic                             | #   | Checklist item                                                                                                                                                                                                                              | Information reported                |                          | Page number(s)          |
|-------------------------------------------|-----|---------------------------------------------------------------------------------------------------------------------------------------------------------------------------------------------------------------------------------------------|-------------------------------------|--------------------------|-------------------------|
|                                           |     |                                                                                                                                                                                                                                             | Yes                                 | No                       |                         |
| <b>Objectives</b>                         | 7   | Provide an explicit statement of the question(s) the review will address with reference to participants, interventions, comparators, and outcomes (PICO)                                                                                    | <input checked="" type="checkbox"/> | <input type="checkbox"/> | 5                       |
| <b>METHODS</b>                            |     |                                                                                                                                                                                                                                             |                                     |                          |                         |
| <b>Eligibility criteria</b>               | 8   | Specify the study characteristics (e.g., PICO, study design, setting, time frame) and report characteristics (e.g., years considered, language, publication status) to be used as criteria for eligibility for the review                   | <input checked="" type="checkbox"/> | <input type="checkbox"/> | 5-6                     |
| <b>Information sources</b>                | 9   | Describe all intended information sources (e.g., electronic databases, contact with study authors, trial registers, or other grey literature sources) with planned dates of coverage                                                        | <input checked="" type="checkbox"/> | <input type="checkbox"/> | 6-7                     |
| <b>Search strategy</b>                    | 10  | Present draft of search strategy to be used for at least one electronic database, including planned limits, such that it could be repeated                                                                                                  | <input checked="" type="checkbox"/> | <input type="checkbox"/> | 7, Supplementary file 2 |
| <b>STUDY RECORDS</b>                      |     |                                                                                                                                                                                                                                             |                                     |                          |                         |
| Data management                           | 11a | Describe the mechanism(s) that will be used to manage records and data throughout the review                                                                                                                                                | <input checked="" type="checkbox"/> | <input type="checkbox"/> | 7                       |
| Selection process                         | 11b | State the process that will be used for selecting studies (e.g., two independent reviewers) through each phase of the review (i.e., screening, eligibility, and inclusion in meta-analysis)                                                 | <input checked="" type="checkbox"/> | <input type="checkbox"/> | 7                       |
| Data collection process                   | 11c | Describe planned method of extracting data from reports (e.g., piloting forms, done independently, in duplicate), any processes for obtaining and confirming data from investigators                                                        | <input checked="" type="checkbox"/> | <input type="checkbox"/> | 7-8                     |
| <b>Data items</b>                         | 12  | List and define all variables for which data will be sought (e.g., PICO items, funding sources), any pre-planned data assumptions and simplifications                                                                                       | <input checked="" type="checkbox"/> | <input type="checkbox"/> | 8                       |
| <b>Outcomes and prioritization</b>        | 13  | List and define all outcomes for which data will be sought, including prioritization of main and additional outcomes, with rationale                                                                                                        | <input type="checkbox"/>            | <input type="checkbox"/> | N.a.                    |
| <b>Risk of bias in individual studies</b> | 14  | Describe anticipated methods for assessing risk of bias of individual studies, including whether this will be done at the outcome or study level, or both; state how this information will be used in data synthesis                        | <input checked="" type="checkbox"/> | <input type="checkbox"/> | 8                       |
| <b>DATA</b>                               |     |                                                                                                                                                                                                                                             |                                     |                          |                         |
| <b>Synthesis</b>                          | 15a | Describe criteria under which study data will be quantitatively synthesized                                                                                                                                                                 | <input type="checkbox"/>            | <input type="checkbox"/> | N.a.                    |
|                                           | 15b | If data are appropriate for quantitative synthesis, describe planned summary measures, methods of handling data, and methods of combining data from studies, including any planned exploration of consistency (e.g., $I^2$ , Kendall's tau) | <input type="checkbox"/>            | <input type="checkbox"/> | N.a.                    |

| Section/topic                            | #   | Checklist item                                                                                                              | Information reported                |                                     | Page number(s)                                                                                                           |
|------------------------------------------|-----|-----------------------------------------------------------------------------------------------------------------------------|-------------------------------------|-------------------------------------|--------------------------------------------------------------------------------------------------------------------------|
|                                          |     |                                                                                                                             | Yes                                 | No                                  |                                                                                                                          |
|                                          | 15c | Describe any proposed additional analyses (e.g., sensitivity or subgroup analyses, meta-regression)                         | <input type="checkbox"/>            | <input type="checkbox"/>            | N.a.                                                                                                                     |
|                                          | 15d | If quantitative synthesis is not appropriate, describe the type of summary planned                                          | <input checked="" type="checkbox"/> | <input type="checkbox"/>            | Descriptive structured narratives and descriptive statistics of key features of included economic evaluations<br><br>8-9 |
| <b>Meta-bias(es)</b>                     | 16  | Specify any planned assessment of meta-bias(es) (e.g., publication bias across studies, selective reporting within studies) | <input type="checkbox"/>            | <input checked="" type="checkbox"/> | N.a.                                                                                                                     |
| <b>Confidence in cumulative evidence</b> | 17  | Describe how the strength of the body of evidence will be assessed (e.g., GRADE)                                            | <input type="checkbox"/>            | <input checked="" type="checkbox"/> | N.a.                                                                                                                     |

Brundisini et al.

Economic evaluations of scaling up strategies of evidence-based health interventions: A systematic review protocol

Table. 1 - Search strategy in Ovid MEDLINE

**Medline-Ovid (2020-10-14)**

| <b>Concepts</b>                                   | <b>Search strategy keywords</b>                                                                                                                                                                                                                                                                                                                | <b>Search</b> |
|---------------------------------------------------|------------------------------------------------------------------------------------------------------------------------------------------------------------------------------------------------------------------------------------------------------------------------------------------------------------------------------------------------|---------------|
| Scaling (Controlled Vocabulary)                   | "diffusion of innovation"/ or Organizational Innovation/                                                                                                                                                                                                                                                                                       | #1            |
| Scaling (Free text)                               | ("scal* up" or "scal* out").ab,kf,kw,ti.                                                                                                                                                                                                                                                                                                       | #2            |
|                                                   | ((("scaling" or widespread or spread? or spreading or "rolling out" or "roll out" or "rolls out" or "rolled out" or upscaling or scalability or scalable) adj5 (innovation? or intervention? or technolog* or practice* or care or initiative* or program* or product? or therap* or service* or strateg* or change? or proces*)).ab,kf,kw,ti. | #3            |
|                                                   | ((bring* or brought or taking or take* or increas* or going or implement* or econom*) adj5 scal* adj5 (innovation? or intervention? or technolog* or practice* or care or initiative* or program* or product? or therap* or service* or strateg* or change? or proces*)).ab,kf,kw,ti.                                                          | #4            |
| Scaling (Free text)                               | 2 or 3 or 4                                                                                                                                                                                                                                                                                                                                    | #5            |
| Scaling                                           | 1 or 5                                                                                                                                                                                                                                                                                                                                         | #6            |
| Economic Evaluation (Controlled Vocabulary)       | "costs and cost analysis"/ or cost-benefit analysis/ or Economics, Dental/ or exp Economics, Hospital/ or Economics, Medical/ or Economics, Nursing/ or Economics, Pharmaceutical/                                                                                                                                                             | #7            |
| Economic Evaluation (Free text)                   | ("cost analysis" or "cost-benefit*" or "cost comparison*" or (cost* adj2 description*) or "cost-effective*" or "cost estimat*" or "cost minimization" or "cost-utility" or "Economic analys*" or "Economic evaluation*" or "net benefit*" or overhead or (value adj3 money)).ab,kf,kw,ti.                                                      | #8            |
| Economic Evaluation                               | 7 or 8                                                                                                                                                                                                                                                                                                                                         | #9            |
| Scaling AND Economic Evaluation                   | 6 and 9                                                                                                                                                                                                                                                                                                                                        | #10           |
| Scaling AND Economic Evaluation                   | Organizational Innovation/ec [Economics]                                                                                                                                                                                                                                                                                                       | #11           |
| Total Result                                      | 10 or 11                                                                                                                                                                                                                                                                                                                                       | #12           |
| Filter for abstract comment, editorial, protocol, | academic dissertation/ or clinical conference/ or clinical trial protocol/ or comment/ or editorial/ or meeting abstract/                                                                                                                                                                                                                      | #13           |

Brundisini et al.

## Economic evaluations of scaling up strategies of evidence-based health interventions: A systematic review protocol

| Concepts                                                             | Search strategy keywords                                                                                                                                                                                   | Search |
|----------------------------------------------------------------------|------------------------------------------------------------------------------------------------------------------------------------------------------------------------------------------------------------|--------|
| theses<br>(Controlled Vocabulary)                                    |                                                                                                                                                                                                            |        |
| Filter for abstract comment, editorial, protocol, theses (Free text) | ("clinical conference*" or comment* or congress* or "consensus development conference*" or editorial or "english abstract*" or lecture*).pt.                                                               | #14    |
|                                                                      | (Comment* or editorial or Protocol).ti.                                                                                                                                                                    | #15    |
| Filter for abstract comment, editorial, protocol, theses             | 13 or 14 or 15                                                                                                                                                                                             | #16    |
| Without the filter for abstract comment, editorial, protocol, theses | 12 not 16                                                                                                                                                                                                  | #17    |
| Filter for Review (Controlled Vocabulary)                            | META-ANALYSIS/                                                                                                                                                                                             | #18    |
| Filter for Review (Free text)                                        | ("systematic review*" or "overview review*" or "literature review*" or "scoping review*" or meta-analy* or metaanaly* or meta-synthesis or metasynthesis or ((research or literature) adj3 synthesis)).ti. | #19    |
|                                                                      | (cinahl or (cochrane adj3 trial*) or embase or medline or psyclit or (psycinfo not "psycinfo database") or pubmed or scopus or "sociological abstracts" or "web of science").ab.                           | #20    |
|                                                                      | ("cochrane database of systematic reviews" or evidence report technology assessment or evidence report technology assessment summary).jn.                                                                  | #21    |
|                                                                      | ((review* or "Meta Analysis" or guideline* or "practice guideline*" or "systematic review*") not "Book review" ).pt.                                                                                       | #22    |
|                                                                      | 19 or 20 or 21 or 22                                                                                                                                                                                       | #23    |
| Filter for review                                                    | 18 or 23                                                                                                                                                                                                   | #24    |
| Without the filter for review                                        | 17 not 24                                                                                                                                                                                                  | #25    |



# BMJ Open

## Economic evaluations of scaling up strategies of evidence-based HEALTH interventions: a systematic review Protocol

|                                 |                                                                                                                                                                                                                                                                                                                                                                                                                                                                                                                                                                                                                                                                                                                                                                                                                                                                                                                                                                                                                                                                                                                                                                                                                                                                                                                                                                                                                                                                                                                                                                                                                                                                                                                                                                                                                                                                                                                                                                                                                                                                                                                 |
|---------------------------------|-----------------------------------------------------------------------------------------------------------------------------------------------------------------------------------------------------------------------------------------------------------------------------------------------------------------------------------------------------------------------------------------------------------------------------------------------------------------------------------------------------------------------------------------------------------------------------------------------------------------------------------------------------------------------------------------------------------------------------------------------------------------------------------------------------------------------------------------------------------------------------------------------------------------------------------------------------------------------------------------------------------------------------------------------------------------------------------------------------------------------------------------------------------------------------------------------------------------------------------------------------------------------------------------------------------------------------------------------------------------------------------------------------------------------------------------------------------------------------------------------------------------------------------------------------------------------------------------------------------------------------------------------------------------------------------------------------------------------------------------------------------------------------------------------------------------------------------------------------------------------------------------------------------------------------------------------------------------------------------------------------------------------------------------------------------------------------------------------------------------|
| Journal:                        | <i>BMJ Open</i>                                                                                                                                                                                                                                                                                                                                                                                                                                                                                                                                                                                                                                                                                                                                                                                                                                                                                                                                                                                                                                                                                                                                                                                                                                                                                                                                                                                                                                                                                                                                                                                                                                                                                                                                                                                                                                                                                                                                                                                                                                                                                                 |
| Manuscript ID                   | bmjopen-2021-050838.R1                                                                                                                                                                                                                                                                                                                                                                                                                                                                                                                                                                                                                                                                                                                                                                                                                                                                                                                                                                                                                                                                                                                                                                                                                                                                                                                                                                                                                                                                                                                                                                                                                                                                                                                                                                                                                                                                                                                                                                                                                                                                                          |
| Article Type:                   | Protocol                                                                                                                                                                                                                                                                                                                                                                                                                                                                                                                                                                                                                                                                                                                                                                                                                                                                                                                                                                                                                                                                                                                                                                                                                                                                                                                                                                                                                                                                                                                                                                                                                                                                                                                                                                                                                                                                                                                                                                                                                                                                                                        |
| Date Submitted by the Author:   | 13-Aug-2021                                                                                                                                                                                                                                                                                                                                                                                                                                                                                                                                                                                                                                                                                                                                                                                                                                                                                                                                                                                                                                                                                                                                                                                                                                                                                                                                                                                                                                                                                                                                                                                                                                                                                                                                                                                                                                                                                                                                                                                                                                                                                                     |
| Complete List of Authors:       | <p>Brundisini, Francesca; CIUSSS de la Capitale-Nationale, Knowledge Translation and Implementation component of the Quebec SPOR-SUPPORT Unit; Université Laval, Département d'opérations et systèmes de décision</p> <p>Zomahoun, Hervé Tchala Vignon; CIUSSS de la Capitale-Nationale, Knowledge Translation and Implementation component of the Quebec SPOR-SUPPORT Unit; Université Laval, Department of Family Medicine and Emergency Medicine</p> <p>Légaré, France; Université Laval, Department of Family Medicine and Emergency Medicine; CIUSSS de la Capitale-Nationale, VITAM Centre de recherche sur la santé durable</p> <p>Rhéault, Nathalie; CIUSSS de la Capitale-Nationale, Knowledge Translation and Implementation component of the Quebec SPOR-SUPPORT Unit; CIUSSS de la Capitale-Nationale, Vitam, Centre de recherche en santé durable -Université Laval</p> <p>Bernard-Uwizeye, Claude; CIUSSS de la Capitale-Nationale, Knowledge Translation and Implementation component of the Quebec SPOR-SUPPORT Unit; CIUSSS de la Capitale-Nationale, VITAM Centre de recherche sur la santé durable</p> <p>Massougbdji, José; CIUSSS de la Capitale-Nationale, Knowledge Translation and Implementation component of the Quebec SPOR-SUPPORT Unit; Université Laval, Department of Family Medicine and Emergency Medicine</p> <p>Gogovor, Amédé; CIUSSS de la Capitale-Nationale, Knowledge Translation and Implementation component of the Quebec SPOR-SUPPORT Unit; Université Laval, Department of Family Medicine and Emergency Medicine</p> <p>Tchoubi, Sébastien; CIUSSS de la Capitale-Nationale, Knowledge Translation and Implementation component of the Quebec SPOR-SUPPORT Unit; Université Laval, Department of Family Medicine and Emergency Medicine</p> <p>Assan, Odilon; CIUSSS de la Capitale-Nationale, Knowledge Translation and Implementation component of the Quebec SPOR-SUPPORT Unit; Université Laval</p> <p>Laberge, Maude; Université Laval, Operations and Decision Systems; CIUSSS de la Capitale-Nationale, VITAM Centre de recherche sur la santé durable</p> |
| <b>Primary Subject Heading</b>: | Evidence based practice                                                                                                                                                                                                                                                                                                                                                                                                                                                                                                                                                                                                                                                                                                                                                                                                                                                                                                                                                                                                                                                                                                                                                                                                                                                                                                                                                                                                                                                                                                                                                                                                                                                                                                                                                                                                                                                                                                                                                                                                                                                                                         |

1  
2  
3  
4  
5  
6  
7  
8  
9  
10  
11  
12  
13  
14  
15  
16  
17  
18  
19  
20  
21  
22  
23  
24  
25  
26  
27  
28  
29  
30  
31  
32  
33  
34  
35  
36  
37  
38  
39  
40  
41  
42  
43  
44  
45  
46  
47  
48  
49  
50  
51  
52  
53  
54  
55  
56  
57  
58  
59  
60

|                            |                                                                                                                                     |
|----------------------------|-------------------------------------------------------------------------------------------------------------------------------------|
| Secondary Subject Heading: | Health economics, Health services research                                                                                          |
| Keywords:                  | HEALTH ECONOMICS, HEALTH SERVICES ADMINISTRATION & MANAGEMENT, Protocols & guidelines < HEALTH SERVICES ADMINISTRATION & MANAGEMENT |
|                            |                                                                                                                                     |

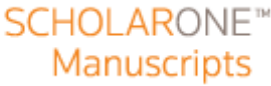



I, the Submitting Author has the right to grant and does grant on behalf of all authors of the Work (as defined in the below author licence), an exclusive licence and/or a non-exclusive licence for contributions from authors who are: i) UK Crown employees; ii) where BMJ has agreed a CC-BY licence shall apply, and/or iii) in accordance with the terms applicable for US Federal Government officers or employees acting as part of their official duties; on a worldwide, perpetual, irrevocable, royalty-free basis to BMJ Publishing Group Ltd ("BMJ") its licensees and where the relevant Journal is co-owned by BMJ to the co-owners of the Journal, to publish the Work in this journal and any other BMJ products and to exploit all rights, as set out in our [licence](#).

The Submitting Author accepts and understands that any supply made under these terms is made by BMJ to the Submitting Author unless you are acting as an employee on behalf of your employer or a postgraduate student of an affiliated institution which is paying any applicable article publishing charge ("APC") for Open Access articles. Where the Submitting Author wishes to make the Work available on an Open Access basis (and intends to pay the relevant APC), the terms of reuse of such Open Access shall be governed by a Creative Commons licence – details of these licences and which [Creative Commons](#) licence will apply to this Work are set out in our licence referred to above.

Other than as permitted in any relevant BMJ Author's Self Archiving Policies, I confirm this Work has not been accepted for publication elsewhere, is not being considered for publication elsewhere and does not duplicate material already published. I confirm all authors consent to publication of this Work and authorise the granting of this licence.

Economic evaluations of scaling up strategies of evidence-based health interventions: a systematic review protocol

## ECONOMIC EVALUATIONS OF SCALING UP STRATEGIES OF EVIDENCE-BASED HEALTH INTERVENTIONS: A SYSTEMATIC REVIEW PROTOCOL

### Corresponding author : Maude Laberge

Département d'opérations et systèmes de décision, Faculté des sciences de l'administration, Université

Laval

2325, rue de la Terrasse, bureau 2519, Québec, G1V 0A6

Tel. +1 418 656 2131, poste 407670

Fax. +1 418 656 2624

[maude.laberge@fsa.ulaval.ca](mailto:maude.laberge@fsa.ulaval.ca)

### List of authors

- Francesca Brundisini<sup>1,4,5,7</sup> [francesca-katherine.brundisini.1@ulaval.ca](mailto:francesca-katherine.brundisini.1@ulaval.ca)
- Hervé Tchala Vignon Zomahoun<sup>1,3,5,7,9</sup> [herve.zomahoun.ciuussscn@ssss.gouv.qc.ca](mailto:herve.zomahoun.ciuussscn@ssss.gouv.qc.ca)
- France Légaré<sup>2,3,5,6,7</sup> [france.legare@mfa.ulaval.ca](mailto:france.legare@mfa.ulaval.ca)
- Nathalie Rheault<sup>1,5,7</sup> [nathalie.rheault.ciuussscn@ssss.gouv.qc.ca](mailto:nathalie.rheault.ciuussscn@ssss.gouv.qc.ca)
- Claude Bernard-Uwizeye<sup>1,5,7</sup> [claud.bernard-uwizeye.ciuussscn@ssss.gouv.qc.ca](mailto:claud.bernard-uwizeye.ciuussscn@ssss.gouv.qc.ca)
- José Massougbodji<sup>1,3,5,7</sup> [jose.massougbodji.ciuussscn@ssss.gouv.qc.ca](mailto:jose.massougbodji.ciuussscn@ssss.gouv.qc.ca)
- Amédé Gogovor<sup>1,2,3,5,7</sup> [amede.gogovor.1@ulaval.ca](mailto:amede.gogovor.1@ulaval.ca)
- Sébastien Tchoubi<sup>1,3</sup> [sebastien.tchoubi.1@ulaval.ca](mailto:sebastien.tchoubi.1@ulaval.ca)
- Odilon Assan<sup>1,5,8</sup> [odilon.assan.1@ulaval.ca](mailto:odilon.assan.1@ulaval.ca)
- Maude Laberge<sup>4,5,6,7</sup> [maude.laberge@fsa.ulaval.ca](mailto:maude.laberge@fsa.ulaval.ca)

Economic evaluations of scaling up strategies of evidence-based health interventions: a systematic review protocol

### List of affiliations

1. Health and Social Services Systems, Knowledge Translation and Implementation component of the Quebec SPOR-SUPPORT Unit, Quebec, Quebec, Canada
2. Tier 1 Canada Research Chair in Shared Decision Making and Knowledge Translation, Université Laval, Quebec, Quebec, Canada
3. Department of Family Medicine and Emergency Medicine, Université Laval, Quebec, Quebec, Canada
4. Department of operations and decision systems, Faculty of Administration, Université Laval, Quebec, Quebec, Canada
5. VITAM Centre de recherche sur la santé durable – Université Laval, Quebec, Canada
6. Centre de recherche du CHU de Québec-Université Laval, Quebec, Quebec, Canada
7. Centre intégré universitaire de santé et de services sociaux de la Capitale-Nationale (CIUSSS-CN), Quebec, Quebec, Canada
8. Faculty of Pharmacy, Université Laval, Quebec, Quebec, Canada
9. Faculty of Medicine, School of Physical and Occupational Therapy, Epidemiology, Biostatistics, and Occupational Health, McGill University, Montreal, Quebec, Canada.

Word count: 3944 words

Economic evaluations of scaling up strategies of evidence-based health interventions: a systematic review protocol

## ABSTRACT

**Introduction:** Scaling science aims to help roll out evidence-based research results on a wide scale to benefit more individuals. Yet, little is known on how to evaluate economic aspects of scaling up strategies of evidence-based health interventions.

**Methods and analysis:** Using the Joanna Briggs Institute guidance on systematic reviews, we will conduct a systematic review of characteristics and methods applied in economic evaluations in scaling up strategies. To be eligible for inclusion, studies must include a scaling up strategy of an evidence-based health intervention delivered and received by any individual or organization in any country and setting. They must report costs and cost-effectiveness outcomes. We will consider full or partial economic evaluations, modelling, and methodological studies. We searched peer-reviewed publications in Medline, Web of Science, Embase, Cochrane Library Database, PEDE, EconLIT, INHATA from their inception onwards. We will search grey literature from international organizations, bilateral agencies, nongovernmental organizations, consultancy firms websites and region-specific databases. Two independent reviewers will screen the records against the eligibility criteria and extract data using a pretested extraction form. We will extract data on study characteristics, scaling up strategies, economic evaluation methods and their components. We will appraise the methodological quality of included studies using the BMJ Checklist. We will narratively summarize the studies' descriptive characteristics, methodological strengths/weaknesses, and the main drivers of cost-effectiveness outcomes. This study will help identify what are the trade-offs of scaling up evidence-based interventions to allocate resources efficiently.

**Ethics and dissemination:** No ethics approval is required as no primary data will be collected. The results will be published in a peer-reviewed, international journal and presented at national and international conferences.

1 Economic evaluations of scaling up strategies of evidence-based health interventions: a systematic review  
2 protocol

3 **KEYWORDS:** Scaling up, Spread, Economic evaluations, Evidence-based health interventions, Systematic  
4 review, Protocol  
5  
6  
7  
8  
9

10 **Open Access Framework registration number** [osf.io/fsq84](https://osf.io/fsq84)  
11  
12  
13  
14  
15  
16  
17  
18  
19  
20  
21  
22  
23  
24  
25  
26  
27  
28  
29  
30  
31  
32  
33  
34  
35  
36  
37  
38  
39  
40  
41  
42  
43  
44  
45  
46  
47  
48  
49  
50  
51  
52  
53  
54  
55  
56  
57  
58  
59  
60

For peer review only

Economic evaluations of scaling up strategies of evidence-based health interventions: a systematic review protocol

### Strengths and limitations of this study

- This is the first systematic review to provide evidence on economic evaluation approaches for the scaling up strategies of evidence-based interventions.
- We plan a strong, rigorous and reproducible methodology for conducting our systematic reviews of economic evaluations.
- We follow the Joanna Briggs Institute guidance for conducting systematic reviews of economic evaluations.
- A comprehensive search strategy will be employed to retrieve both peer-reviewed and grey publications.
- The review may face some limitations to generalizability due to the highly context-specific nature of economic evaluations.



Economic evaluations of scaling up strategies of evidence-based health interventions: a systematic review protocol

## INTRODUCTION

Researchers, healthcare professionals and decision-makers are increasingly focusing on filling the gap between knowledge and practice. In recent years, growing efforts to bridge this gap have produced a vast body of knowledge on the efficacy and effectiveness of health interventions and their implementation in practice.<sup>1-3</sup> Most of this evidence derives from experimental studies in which interventions are delivered under optimal, or at least "best practice" conditions, generally conducted on relatively small populations and from projects done in given settings. To date, these efforts have produced a wide set of well-documented effective health interventions.<sup>1, 2, 4, 5</sup> However, health decision-makers are still not systematically implementing such evidence to benefit more people on a wider scale.<sup>1, 2, 4-8</sup> One way to fill this gap is to develop and implement strategies to scale up effective evidence-based interventions in health (EBIs).<sup>7, 9</sup>

While both efficacy and effectiveness are key to the roll out of EBIs on a large scale, other factors – such as costs and cost-effectiveness – are central to the successful scale up of EBIs.<sup>8, 10-14</sup> As health systems face continuous strains and limited resource availability, economic evaluations can play an important role in informing health decision-makers on the trade-offs in costs health benefits of choosing and defining a scaling up strategy.<sup>10, 12, 14-21</sup> Economic evaluations are a means to both assess the value for money and inform resource allocation decision-making.<sup>22</sup> To do so, economic evaluations compare alternative choices in terms of both costs and consequences.<sup>22</sup> Alternative choices refer to the different ways in which healthcare resources can be used to improve health. The type of economic evaluations are generally defined by the number of alternatives compared, whether both costs and consequences are examined, and how the consequences are expressed.<sup>22</sup>

Little is known on what these evaluations should include to analyze the cost-effectiveness of scaling up strategies, as the cost-effectiveness of EBIs does not necessarily reflect the cost-effectiveness of the scaling up effort.<sup>8, 13, 15-19, 21, 23</sup> While not many, a small number of studies synthesized the costs and cost-effectiveness of scaling up strategies of EBIs in health. Mostly conducted in Low and Middle Income Countries (LMICs), these reviews show that included studies generally focus, among other interventions,

Economic evaluations of scaling up strategies of evidence-based health interventions: a systematic review protocol

on national immunization programs,<sup>21, 24, 25</sup> maternal, infant and children health programs,<sup>20</sup> and HIV/AIDS prevention and care interventions.<sup>16, 26</sup> Despite being conducted in specific geographical areas and having a narrow focus on scaling up strategies of certain health interventions, these reviews provide insights into the economic evaluation research production of scaling up strategies. These reviews reveal a great variability among the included economic evaluation studies. When included, these studies vary in perspectives, scope, approaches, assumptions, cost categories, and are often not presented in a way that can be easily comparable and generalized across settings and countries.<sup>19-21, 26-28</sup>

Oftentimes, the lack of complete availability of scaling up cost data or the use of models leads economic analysts to rely on assumptions that may not reflect the complexity of implementing scaling up strategies.<sup>8, 16-19, 21, 26, 29, 30</sup> For example, economic evaluations of scaling up strategies may posit that scaling up implementation costs are a fixed part of the intervention costs.<sup>19, 30, 31</sup> In reality, scaling up strategies may present additional costs to that of the intervention that can greatly vary across interventions and settings, potentially leading to both economies and/or diseconomies of scale.<sup>29</sup> Costs and cost-effectiveness estimates may change according to the type of intervention being expanded, the size of the targeted population, the prevalence/incidence of the disease, the relevant efficacy level of the intervention, the geography, and the financial resources available and needed.<sup>8, 13, 15-17, 19, 29, 32</sup> Specific to scaling up strategies, costs and estimates related to infrastructure and available human resources can vary based on the different scaling up strategy operationalization and management, the cost impacts of change, including the excess cost of service delivery as uptake changes and the opportunity costs to providers and patients participating in the activities.<sup>8, 13, 15-17, 19, 29, 32</sup> Finally, implementation and scale-up theoretical frameworks – that support thinking and interpretation of “real world” complex data – consider economic constructs in scaling up strategies in different ways. For example, some frameworks consider cost (and resource) mobilisation as a key objective,<sup>33, 34</sup> yet implementation frameworks consider costs as an implementation outcome.<sup>35</sup> Frameworks vary also in the ways they consider potential benefit or effectiveness (‘Cost-benefit’).<sup>36</sup> This variability then results in a wide heterogeneity of studies and approaches when it comes to economically evaluating scaling

Economic evaluations of scaling up strategies of evidence-based health interventions: a systematic review protocol

up strategies. Costs and cost-effectiveness estimates may also vary according to different modelling approaches. For example, ex-ante economic evaluations are often used for informing pre-implementation decision-making using available evidence and modelling to simulate the costs and consequences of alternatives.<sup>15</sup>

We argue then that little is known on how to evaluate the economic aspects of these strategies to understand what constitutes the trade-offs of scaling up evidence-based interventions to allocate resources efficiently. Thus, we seek to identify and describe the methods and issues related to economic evaluations aimed at assessing scaling up strategies of evidence-based interventions (EBIs) in health.

## Objectives

Our goals are to:

- Identify and describe which economic evaluations methods are used to assess scaling up strategies of EBIs in health.
- Identify and describe the costs and cost elements adopted in such economic evaluations.
- Identify and describe environmental factors accounted for in such economic evaluations.
- Discuss the strengths and limitations of each approach and explain reasons for variation in the reporting of economic evaluations of scaling up strategies of EBIs in health.

## METHODS

### Study design

We are conducting a systematic review following Joanna Briggs Institute (JBI) guidance for conducting systematic review of evidence from all (i.e. partial and full) economic evaluations addressing a question(s) about scaling up health intervention strategies' cost-effectiveness.<sup>37, 38</sup> We adopted PRISMA-P guidelines for reporting of systematic reviews protocols.<sup>39</sup> (supplementary additional file 1). We registered the protocol on Open Science Framework database (registration number [osf.io/fsq84](https://osf.io/fsq84) ).

Economic evaluations of scaling up strategies of evidence-based health interventions: a systematic review protocol

### Eligibility criteria

Studies included in the review must adhere to the eligibility criteria described below following the PICOS as outlined in the PRISMA-P guidelines:<sup>39</sup>

**Population:** We will include studies in which the population of interest is any individual, organization, or system – directly or indirectly – involved in the delivery or receipt of any health services that was the target of the scale-up.

**Intervention:** We will include research studies that investigate strategies for scaling up. Included studies must evaluate a scaling up strategy of an EBI (and not the evidence-based health intervention itself). For the purposes of this systematic review, we consider:

- a health intervention to be a health service or a package of health services aimed at improving, maintaining, promoting, or restoring health;<sup>40, 41</sup>
- evidence-based interventions (EBIs) in health as health interventions that are effective, efficacious, and ready for dissemination;<sup>42</sup>
- a strategy as one or more initiatives, approaches, or activities that directly aim to change the supply or demand of EBIs in health to improve reach, adoption, and sustainability of an EBI;
- scaling up in healthcare as the "deliberate efforts to increase the impact of successfully tested health interventions so as to benefit more people and to foster policy and program development on a lasting basis." <sup>12, 34, 43</sup> In other words, scaling up strategies are systematic courses of action that aim to roll out successful local health interventions to regional, national, or international levels to reach broader populations and settings over time.<sup>34, 43</sup>

No restrictions will be made on the type of EBI or impact (effectiveness) metric chosen. The scaling up of an EBI can be implemented as a standalone intervention, or as an addition in combination with other interventions.

1 Economic evaluations of scaling up strategies of evidence-based health interventions: a systematic review  
2 protocol

3 Comparator: There are no restrictions on the type of comparator. Included studies may report economic  
4 evaluations that compare the studied scaling up strategy to current practice (i.e., no scaling up), or to  
5 alternative scaling up strategies.  
6  
7

8  
9  
10 Outcomes: All reported partial or full economic evaluation outcomes are of interest. Outcomes will include  
11 measures related to costs and cost-effectiveness. Partial evaluations focused only on costs will include cost  
12 outcomes reported as monetary amounts. Full economic evaluations cost-effectiveness outcomes will  
13 include incremental cost-effectiveness ratio (ICER), incremental cost-utility ratio (ICUR), net benefit, cost-  
14 benefit ratio. The metric chosen to report the health gain (effectiveness) used in the economic evaluations  
15 will not be an inclusion criterion. It can include (but not restricted to) for instance cost/illness averted,  
16 cost/quality-adjusted life year (QALY) gained, or cost/disability-adjusted life year (DALY) averted. All  
17 viewpoints/analytic perspectives will be considered with no restrictions. We expect that a variety of  
18 outcomes are used in studies to report on the cost-effectiveness of scaling up EBIs. Studies in which only  
19 scaling up strategy's effectiveness, adoption, or health gain was reported will not be included.  
20  
21  
22  
23  
24  
25  
26  
27  
28  
29  
30

31 Study design: Any study design that includes any type of empirical economic evaluation, as well as any  
32 modelling and methodological considerations will be included. We will include both full economic  
33 evaluation designs, such as cost-effectiveness analysis (CEA), cost-utility analysis (CUA) and cost-benefit  
34 analysis (CBA), and partial economic evaluation designs, such as cost minimization analysis (CMA), cost  
35 comparison/cost analysis, cost outcome descriptions, cost descriptions, and budget impact analysis.  
36 Additionally, included modelling studies can be based on a meta-analysis of data from randomised trials or  
37 using secondary data from literature and those based on observational studies or analysis of large  
38 administrative databases. Both published and unpublished grey literature will be included. We will exclude  
39 the following studies: reviews, systematic reviews, qualitative studies, clinical effectiveness studies, critical  
40 reviews, editorials, commentaries, abstracts, protocols, academic theses.  
41  
42  
43  
44  
45  
46  
47  
48  
49  
50  
51  
52

53 Settings: We will review studies independently of the settings, thus, including any healthcare setting (i.e.,  
54 public health, primary care clinic, hospital, etc.) in both rural and urban areas. We will not restrict the  
55  
56  
57

1 Economic evaluations of scaling up strategies of evidence-based health interventions: a systematic review  
2 protocol

3 inclusion criteria based on geography. Economic evaluations undertaken within any country context will be  
4 included.  
5  
6

### 7 **Information sources**

8  
9  
10 The information sources include a search of the following electronic bibliographic databases from their  
11 inception onwards: Medline, Web of Science, Embase, Cochrane Library Database, PEDE, EconLIT,  
12 INHATA. Additionally, since economic evaluation studies are often conducted for the government or by  
13 government agencies, we will systematically perform an internet search as this has been shown to regularly  
14 capture eligible studies not identified by other databases.<sup>25</sup> We will perform an extensive search strategy  
15 using free text, with no restrictions on date and year of publication. A search of web pages of international  
16 organizations, bilateral agencies, nongovernmental organizations (NGOs), and consultancy firms involved  
17 in the delivery, funding or evaluation of scaling up EBIs. Reports found to have a matching publication in  
18 the published literature will be excluded. We will search the following Internet search databases and data  
19 sources: Google, Google Scholar, INESSS (Institut national d'excellence en santé et en services sociaux),  
20 OpenGrey, Grey Literature Report, GreyNet, Canadian Evaluation Society, EuroScan, databases included  
21 in the "Grey Matters – A Practical Deep web Search Tool for Evidence based Medicine" (CADTH)  
22 Checklist, and region-specific databases (African Index Medicus, Eastern Mediterranean Literature (WHO),  
23 Index Medicus for South-East Asia Region, LILACS for Latin America). We will then conduct a webpage  
24 search of following organizations/agency/governmental websites: UNICEF, World Health Organization,  
25 GAVI Alliance, Program for Appropriate Technology in Health (PATH), Johns Hopkins School of Public  
26 Health, World Bank, Global Affairs Canada, UK Department for International Development, and United  
27 States Agency for International Development.  
28  
29  
30  
31  
32  
33  
34  
35  
36  
37  
38  
39  
40  
41  
42  
43  
44  
45  
46  
47

### 48 **Search strategy**

49  
50  
51 Our information specialist (NR) developed a Medline strategy with input from the project team. An iterative  
52 process of revision was conducted by the members of the research team. Comments will be integrated for a  
53  
54  
55  
56  
57

Economic evaluations of scaling up strategies of evidence-based health interventions: a systematic review protocol

final version of the search strategy. This final version was approved by the team members. Once validated, the information specialist (NR) translated this search strategy for each electronic database mentioned above. The present protocol only includes the search strategy conducted in Medline on October, 14<sup>th</sup> 2020 (see supplementary file 2). A hand search will also be performed, and citations and bibliographies of included primary studies and relevant literature reviews will be reviewed for additional relevant articles.

The search will include a combination of the following two concepts: 1) scaling and 3) Economic Evaluation basic terms. No language restrictions will be applied. The search strategy in Ovid Medline is in the Supplementary Materials.

The following sources were used to find the search terms: 1) Previous reviews who used the concept of scaling up<sup>7, 20</sup> and the concept of economic evaluation<sup>20, 21, 44</sup>; 2) The knowledge of the experts of our multidisciplinary team in scaling up 3) The thesaurus of the consulted bibliographic databases. All words and expressions found were tested and evaluated by the information specialist before to be integrated or rejected in the search strategy. The search strategy was commented via an iterative process by the others members of the team for the production of the final version.

The concept Scaling was created for retrieved all the potential expressions for designed the idea of the spreading of an innovation. It is designed to retrieved very used expression like "scaling up", "scale up", "spread of technologies", but also many variations like "widespread adoption of the technology" or "rolling out the model of care". The concept of Economic Evaluation integrated all synonyms like "cost evaluation", "economic analysis" and "net benefit".

## **Study records**

### Data management

In this ongoing study, we exported all citations identified from the electronic databases into Endnote X9 (citation manager software). We used EndNote X9 to remove duplicates in addition to manual checking to

Economic evaluations of scaling up strategies of evidence-based health interventions: a systematic review protocol

identify unique citations for the study selection process. Unique records were then exported into Covidence (internet-based screening and data extraction tool).

#### Selection process

All stages of the selection process will be performed independently by two reviewers. One reviewer (FB) developed and tested (after team validation) together with the second reviewer a pilot screening form against the eligibility criteria on a 7.5% random sample of the retrieved citations (title and abstracts) to validate the process of inclusion of articles in the review (see the data extraction codebook form template in the supplementary file 3). This piloting stage ensured reviewers shared a common understanding of the eligibility criteria. At the title and abstract stage, the reviewers will independently screen the titles and abstracts with regard to the inclusion/exclusion criteria using Covidence. Studies not fulfilling the eligibility criteria will be excluded, and the full texts of the remaining studies will be retrieved for further assessment. Articles with abstracts that do not appear to meet the criteria for exclusion or are ambiguous, or that have a missing abstract, will be retained and reviewed in full. The full text of retained studies will be independently assessed for exclusion against inclusion/exclusion criteria by both reviewers. To resolve eligibility questions, we will contact the authors of the included studies to seek additional information. Discrepancies between reviewers will be solved through discussion, and – if needed – a consultation with a third reviewer. Any reasons for exclusion will be recorded in Covidence at the full text stage. The results of the identification, screening and inclusion process will be displayed using the PRISMA flowchart.<sup>39</sup>

#### Data collection process

A standardized data extraction template form will be piloted in duplicate by the reviewers. The extraction form will be informed by the study objectives, eligibility criteria and the JBI-ACTUARI tool.<sup>37</sup> This template form will allow to extract from each study information on the key characteristics, the results for the outcomes of interest, and the author conclusions.<sup>38</sup> The form will be tested on a 10% random sample of the included studies for data collection. This pilot test will help to identify extraction items that are missing



1 Economic evaluations of scaling up strategies of evidence-based health interventions: a systematic review  
2 protocol

3 from the template, or likely to be confusing or unnecessary. Authors' consensus will be required before the  
4 form can be modified if deemed appropriate. The investigators will use the finalized revised and agreed  
5 upon version of the data extraction form to extract data independently.  
6  
7  
8

### 9 **Data items**

10  
11  
12 The data extracted will cover: firstly descriptive data about (i) the study general characteristics (e.g., title,  
13 short name, corresponding author name, funding source, conflict of interest), study type (published or grey  
14 literature), study population/participants, type of scaled up intervention and authors' description of  
15 intervention (including whether it was a standalone intervention or a combination of interventions), type of  
16 scaling up strategy (including scaling up level of implementation) and authors' description of strategy, its  
17 comparator(s) and outcomes; (ii) study methods including evaluation design type, analytic viewpoint(s),  
18 prices and currency used for costing, time period of analysis; sensitivity testing; source of effectiveness  
19 data, measures of resource use, cost and health effect/clinical and cost effectiveness; (iii) study context  
20 (geographical, healthcare and broader service delivery setting); secondly reported results for the resource  
21 use and/or cost and/or cost effectiveness measures; thirdly, when possible author conclusions about factors  
22 that promote and limit the cost-effectiveness of scaling up EBIs strategies.  
23  
24  
25  
26  
27  
28  
29  
30  
31  
32  
33  
34  
35

### 36 **Quality appraisal**

37  
38  
39 There is still no consensus among health economic experts on which guidelines to follow when conducting  
40 systematic reviews of economic evaluations.<sup>45-48</sup> We will be using Drummond and Jefferson checklist, also  
41 known as the British medical journal (BMJ) checklist, as it was designed for full economic evaluations but  
42 also applicable to partial economic evaluations, report and commentaries on economic evaluations, thus  
43 aligned to our broad inclusion criteria.<sup>49</sup> The BMJ tool is a Yes/No, thirty-five items checklist organized in  
44 three sections: study design, data collection, and analysis and interpretation of results.<sup>49</sup> If items are not  
45 applicable to a specific study, a "not appropriate" (NA) response can be stated. Critical appraisal will be  
46  
47  
48  
49  
50  
51  
52  
53  
54  
55  
56  
57  
58  
59  
60

Economic evaluations of scaling up strategies of evidence-based health interventions: a systematic review protocol

undertaken independently by two individuals. If any disagreements arise, they will be discussed between the two reviewers and if need be resolved by team consensus or by a third reviewer.

### **Data synthesis**

We will use descriptive structured narratives, statistics, and tables to identify and summarize the key features of the included economic evaluations of scaling-up strategies and the elements considered in such evaluations. Narrative synthesis will be used to summarize the methods, highlighting important characteristics of the studies when relevant, focusing on differences/similarities and methodological weaknesses, and where possible identifying the main drivers of cost-effectiveness outcomes. In particular, the synthesis will focus on:

- The assumed key theoretical trade-offs (between levels and types of resources, and levels and types of outcome) of scaling up strategies used in the included economic evaluations.
- The level and configuration of scaling up resources examined in the economic evaluations, how they are related to the levels and types of outcomes observed, and the contextual/environmental factors accounted for in these relationships.
- The conclusions regarding the relationship between the cost-effectiveness of the scaling up strategy under examination and the economic evaluation approach.
- Strengths and weaknesses of each approach for evaluating scaling up strategies of EBIs.

We expect to include a plurality of economic evaluation studies assessing scaling up strategies of EBIs with diverse interventions, populations, and settings, thus we anticipate that there will be heterogeneity making difficult to perform a meta-analysis with interpretable results. We will explore this heterogeneity by narratively synthesizing the differences, and if possible, the similarities in settings, participants, intervention, comparison and outcomes characteristics across studies. For example, we will perform the data synthesis of economic evaluation methods according to the economic evaluation parameters reported.

### **Patient and Public Involvement**

1 Economic evaluations of scaling up strategies of evidence-based health interventions: a systematic review  
2 protocol

3 Patients and the public were not involved in the design of this study.  
4

## 5 **DISCUSSION**

6  
7  
8 The identification and description of the methods and issues related to the economic evaluations for the  
9 scaling up strategies of EBIs in health will help understand what constitutes the trade-offs of scaling up  
10 evidence-based interventions to allocate resources efficiently. It will contribute to both health economic  
11 evaluation research in scaling science and its implementation in policy and practice. Large-scale health  
12 intervention implementation warrants governmental investment, this will also require demonstrable benefits  
13 for the patients, providers, and society at large. As our world is currently hitting rock bottom by an unseen  
14 pandemic – i.e., Covid-19 – healthcare systems are in more need than ever to understand how to best reduce  
15 waste<sup>50</sup> and increase the roll out of what has more benefits than harms at the lowest cost. If deliberate efforts  
16 are not taken to efficiently allocate resources on a wide scale, healthcare systems will collapse.  
17  
18

19 To the best of our knowledge, this will be the first review that will systematically outline and summarize  
20 different economic evaluation approaches used in scaling up strategies of EBIs in health. The science of  
21 scale is young and has been too often either completely undermined or clustered with that of sustainability.<sup>51</sup>  
22  
23

24 This study will offer a valuable picture of the advancements and gaps in the application of economic  
25 evaluation methods in the scaling science. Earlier reviews of economic evaluations considering scaling up  
26 strategies were narrower and focused only on scaling up strategies of specific health interventions. As such,  
27 we believe that the findings of this study will point to identify valid recommendations for action for future  
28 research and decision-makers. First, this study can help guide future research aimed at defining costing  
29 tools and models that can be easily used in scaling up frameworks and plans. It will contribute to define the  
30 nature and selection of costs that are integral to the successful roll out of EBIs on large scale, as well as the  
31 benefits and disadvantages of each economic methodological approaches aimed at evaluating strategies  
32 identified in the literature. Second, as scaling science is becoming an increasingly relevant area for research,  
33 policy, and practice, clarifying how underlying methodological assumptions are based on evidence and on  
34 the multi-factorial complexity of real-world scaling strategies will advance the quantity and quality of the  
35  
36  
37  
38  
39  
40  
41  
42  
43  
44  
45  
46  
47  
48  
49  
50  
51  
52  
53  
54  
55  
56  
57

Economic evaluations of scaling up strategies of evidence-based health interventions: a systematic review protocol

information extractable from the evidence to inform both research and practice.<sup>8</sup> We believe this review will then offer opportunities for improvement in the quality, production, reporting, and application in practice of health economic evaluative methods to scaling up strategies.

Second, we hope that this work will support the use of economic evaluations in policies that aim to successfully implement EBIs on a large scale. While health economic evaluations are a well-established component of health technology assessments, their use in implementation science, and in particular scaling science, remains limited.<sup>15 32</sup> Yet, unless there are sufficient resources, not all possible scaling up strategies can be implemented. Health decision-makers need to have a clear, evidence-based understanding of the financial implications of scaling up EBIs to make an informed choice to use resources efficiently. Without systematically examining and reporting cost and cost-effectiveness evidence the allocation of financial resources to scaling up strategies may be too high or too low. Economic evidence is then crucial for decision makers to design scaling up strategies that are affordable and that represent an efficient use of current available resources.

### **Ethics and dissemination**

Our research project is a systematic review based on existing primary studies and methodological papers and as such it will not be necessary to request ethics approval. Additionally, we follow the Canadian Institute for Health Research (CIHR) *Ethics Guidance for Developing Partnerships with Patients and Researchers* to guide the active dissemination of our findings.<sup>52</sup> As per CIHR guidelines, no ethical approval is required when engaging patients and public for actively disseminating research findings.

We plan to use passive and active dissemination strategies to disseminate our findings. First, we will publish this study's protocol and later the results of this project in leading peer-reviewed journals in health implementation and services research. We will also share our findings at local, national, and international conferences addressing audiences interested in implementation science, scaling science, and health economics. Second, findings from this project will be relevant for health administrators, decision-makers,

1 Economic evaluations of scaling up strategies of evidence-based health interventions: a systematic review  
2 protocol

3 health professionals and patients. To reach these audiences, we will use our networks with health  
4 organizations and health research groups (such as the Quebec Strategy for Patient-Oriented Research  
5 (SPOR) Unit). We will tailor the dissemination message to fit each audience and select champions to  
6 disseminate our results. Finally, we will use different communication channels, such as newsletters,  
7 organization websites, and webinars, to reach all relevant audiences.  
8  
9  
10  
11  
12  
13  
14  
15  
16  
17  
18  
19  
20  
21

22 **Author contributions:** FB, ML, HTVZ and FL conceptualized the idea and developed the design for the  
23 systematic review. They developed the research questions which were discussed with NR, CBU, JM, AG,  
24 ST, and OA and agreed upon by all authors. NR designed the search strategy which was reviewed by all  
25 authors. FB, CBU, JM, AG, ST and OA contributed to a preliminary process of article selection, which  
26 enabled further clarification of the research question and of eligibility criteria for the studies that would be  
27 included. Members of the executive committee (FB, ML, HTVZ, AG, NR, and FR) contributed to the  
28 conception and design. FB drafted the initial version of the protocol which was critically revised by ML,  
29 HTVZ and FL. A revised version of the protocol was shared with co-authors who all provided a critical  
30 review of the protocol. All authors read and approved the final protocol.  
31  
32  
33  
34  
35  
36  
37  
38  
39  
40  
41  
42  
43  
44

45 **Funding statement:** This review is funded by the Quebec Strategy for Patient-Oriented Research (SPOR)  
46 - Support for People and Patient-Oriented and Trials (SUPPORT) Unit (Grant number: #SU1-139759). This  
47 Unit is supported by the Canadian Institutes of Health Research (CIHR) and provincial partners, including  
48 the Ministère de la Santé et des Services sociaux (MSSS) du Québec and the Fonds de recherche du Québec  
49 – Santé (FRQ-S). The funders have no role in developing the review protocol.  
50  
51  
52  
53  
54  
55  
56  
57  
58  
59  
60

Economic evaluations of scaling up strategies of evidence-based health interventions: a systematic review protocol

**Competing interests statement:** None to declare.

**Abbreviations:** EBIs: evidence-based interventions; LMICs: Low and Middle Income Countries; JBI: Joanna Briggs Institute; PRISMA-P: Preferred Reporting Items for Systematic Reviews and Meta-Analyses protocols; CINHAL: Cumulative Index to Nursing and Allied Health Literature; EMBASE: Excerpta Medica dataBASE; MEDLINE: Medical Literature Analysis and Retrieval System Online; PEDE: Paediatric Economic Database Evaluation; INHATA: International Network of Agencies for Health Technology Assessment; INESSS: Institut national d'excellence en santé et en services sociaux; CADTH: Canadian Agency for Drugs and Technologies in Health; LILACS: Literatura Latino-Americana e do Caribe em Ciências da Saúde; PICOS: Population, Intervention, Comparison, Outcomes, Study design; ICER: incremental cost-effectiveness ratio; ICUR: incremental cost-utility ratio; QALY: quality-adjusted life year; DALY: disability-adjusted life year; CEA: cost-effectiveness analysis; CUA: cost-utility analysis; CBA: cost-benefit analysis; CMA: cost minimization analysis; ACTUARI: Analysis of Cost, Technology and Utilisation Assessment and Review Instrument.

## References

1. Massoud MR DK, McCannon CJ. Options for Large-scale Spread of Simple, High impact Interventions. : USAID Health Care Improvement Proj. Bethesda, MD: University Research Co, 2010.
2. Eaton J, McCay L, Semrau M, et al. Scale up of services for mental health in low-income and middle-income countries. *The Lancet* 2011;378(9802):1592-603. doi: 10.1016/s0140-6736(11)60891-x
3. Greenhalgh T, Howick J, Maskrey N. Evidence based medicine: a movement in crisis? *BMJ : British Medical Journal* 2014;348:g3725. doi: 10.1136/bmj.g3725
4. Damschroder LJ, Aron DC, Keith RE, et al. Fostering implementation of health services research findings into practice: a consolidated framework for advancing implementation science. *Implementation Science* 2009;4(1):50. doi: 10.1186/1748-5908-4-50
5. Shaw J, Tepper J, Martin D. From pilot project to system solution: innovation, spread and scale for health system leaders. *BMJ Leader* 2018;2(3):87-90. doi: 10.1136/leader-2017-000055
6. Whitworth J, Sewankambo NK, Snewin VA. Improving Implementation: Building Research Capacity in Maternal, Neonatal, and Child Health in Africa. *PLoS Medicine* 2010;7(7):e1000299. doi: 10.1371/journal.pmed.1000299

Economic evaluations of scaling up strategies of evidence-based health interventions: a systematic review protocol

7. Ben Charif A, Zomahoun HTV, LeBlanc A, et al. Effective strategies for scaling up evidence-based practices in primary care: a systematic review. *Implementation Science* 2017;12(1):139. doi: 10.1186/s13012-017-0672-y
8. Zomahoun HTV, Ben Charif A, Freitas A, et al. The pitfalls of scaling up evidence-based interventions in health. *Glob Health Action* 2019;12(1):1670449. doi: 10.1080/16549716.2019.1670449 [published Online First: 2019/10/03]
9. Kruk ME, Yamey G, Angell SY, et al. Transforming Global Health by Improving the Science of Scale-Up. *PLOS Biology* 2016;14(3):e1002360. doi: 10.1371/journal.pbio.1002360
10. Mangham LJ, Hanson K. Scaling up in international health: what are the key issues? *Health policy and planning* 2010;25(2):85-96. doi: 10.1093/heapol/czp066 [published Online First: 2010/01/15]
11. Organization WH. Scaling up Health Services: Challenges and choices. WHO2008.
12. Simmons R, Fajans P, Ghiron L. Scaling up health service delivery: from pilot innovations to policies and programmes. Geneva: World Health Organization2007.
13. Victora CG, Hanson K, Bryce J, et al. Achieving universal coverage with health interventions. *The Lancet* 2004;364(9444):1541-48. doi: [https://doi.org/10.1016/S0140-6736\(04\)17279-6](https://doi.org/10.1016/S0140-6736(04)17279-6)
14. Milat AJ, Newson R, King L. Increasing the scale of population health interventions: A guide. In: Evidence CfEa, ed. North Sydney: NSW Ministry of Health, 2014.
15. Roberts SLE, Healey A, Sevdalis N. Use of health economic evaluation in the implementation and improvement science fields—a systematic literature review. *Implementation Science* 2019;14(1) doi: 10.1186/s13012-019-0901-7
16. Salomon JA. Integrating Economic Evaluation and Implementation Science to Advance the Global HIV Response. *JAIDS Journal of Acquired Immune Deficiency Syndromes* 2019;82:S314-S21. doi: 10.1097/qai.0000000000002219
17. Adam T, Ebener S, Johns B, et al. Capacity utilization and the cost of primary care visits: Implications for the costs of scaling up health interventions. *Cost Effectiveness and Resource Allocation* 2008;6(1):22. doi: 10.1186/1478-7547-6-22
18. Johns B, Baltussen R, Hutubessy R. *Cost Effectiveness and Resource Allocation* 2003;1(1):1. doi: 10.1186/1478-7547-1-1
19. Johns B, Torres TT. Costs of scaling up health interventions: a systematic review. *Health policy and planning* 2005;20(1):1-13. doi: 10.1093/heapol/czi001
20. Carroll G, Safon C, Buccini G, et al. A systematic review of costing studies for implementing and scaling-up breastfeeding interventions: what do we know and what are the gaps? *Health policy and planning* 2020;35(4):461-501. doi: 10.1093/heapol/czaa005
21. Munk C, Portnoy A, Suharlim C, et al. Systematic review of the costs and effectiveness of interventions to increase infant vaccination coverage in low- and middle-income countries. *BMC Health Services Research* 2019;19(1) doi: 10.1186/s12913-019-4468-4
22. Drummond MF, Sculpher MJ, Claxton K, et al. Methods for the Economic Evaluation of Health Care Programmes. Oxford, UNITED KINGDOM: Oxford University Press 2015.
23. Eisman AB, Kilbourne AM, Dopp AR, et al. Economic evaluation in implementation science: making the business case for implementation strategies. *Psychiatry research* 2020;283:112433.
24. Pegurri E, Fox-Rushby JA, Damian W. The effects and costs of expanding the coverage of immunisation services in developing countries: a systematic literature review. *Vaccine* 2005;23(13):1624-35. doi: <https://doi.org/10.1016/j.vaccine.2004.02.029>
25. Batt K, Fox-Rushby JA, Castillo-Riquelme M. The costs, effects and cost-effectiveness of strategies to increase coverage of routine immunizations in low- and middle-income countries: systematic review of the grey literature. *Bull World Health Organ* 2004;82(9):689-96.

Economic evaluations of scaling up strategies of evidence-based health interventions: a systematic review protocol

26. Gomez GB, Borquez A, Case KK, et al. The cost and impact of scaling up pre-exposure prophylaxis for HIV prevention: a systematic review of cost-effectiveness modelling studies. *PLoS Med* 2013;10(3):e1001401. doi: 10.1371/journal.pmed.1001401 [published Online First: 2013/04/05]
27. Vassall A, Compennolle P. Estimating the resource needs of scaling-up HIV/AIDS and tuberculosis interventions in sub-Saharan Africa: A systematic review for national policy makers and planners. *Health Policy* 2006;79(1):1-15. doi: 10.1016/j.healthpol.2005.11.005
28. Marseille E, Jiwani A, Raut A, et al. Scaling up integrated prevention campaigns for global health: costs and cost-effectiveness in 70 countries. *BMJ open* 2014;4(6):e003987. doi: 10.1136/bmjopen-2013-003987 [published Online First: 2014/06/28]
29. Turner HC, Toor J, Hollingsworth TD, et al. Economic Evaluations of Mass Drug Administration: The Importance of Economies of Scale and Scope. *Clinical Infectious Diseases* 2018;66(8):1298-303. doi: 10.1093/cid/cix1001
30. Turner HC, Truscott JE, Fleming FM, et al. Cost-effectiveness of scaling up mass drug administration for the control of soil-transmitted helminths: a comparison of cost function and constant costs analyses. *The Lancet Infectious diseases* 2016;16(7):838-46. doi: 10.1016/s1473-3099(15)00268-6 [published Online First: 2016/02/22]
31. Kumaranayake L. The economics of scaling up: cost estimation for HIV/AIDS interventions. *AIDS* 2008;22:S23-S33. doi: 10.1097/01.aids.0000327620.47103.1d
32. Hoomans T, Severens JL. Economic evaluation of implementation strategies in health care. *Implementation Science* 2014;9(1) doi: 10.1186/s13012-014-0168-y
33. Scaling up health service innovations: a framework for action; 2007.
34. ExpandNet. WHOa. Nine steps for developing a scaling-up strategy. Geneva: WHO, 2010.
35. Proctor E, Silmere H, Raghavan R, et al. Outcomes for implementation research: conceptual distinctions, measurement challenges, and research agenda. *Adm Policy Ment Health* 2011;38(2):65-76. doi: 10.1007/s10488-010-0319-7 [published Online First: 2010/10/20]
36. Vicki B, Huong T, Miranda B, et al. A narrative review of economic constructs in commonly used implementation and scale-up theories, frameworks and models. *Health Research Policy and Systems* 2020;18(1):115. doi: 10.1186/s12961-020-00633-6
37. Gomersall JS, Jadotte YT, Xue Y, et al. Conducting systematic reviews of economic evaluations. *Int J Evid Based Healthc* 2015;13(3):170-8. doi: 10.1097/xeb.000000000000063 [published Online First: 2015/08/20]
38. Judith Streak Gomersall YTJ, Yifan Xue, Suzi Lockwood, Dru Riddle, Alin Preda. The Systematic Review of Economic Evaluation Evidence. Joanna Briggs Institute Reviewers' Manual: The Joanna Briggs Institute 2014.
39. Moher D, Shamseer L, Clarke M, et al. Preferred reporting items for systematic review and meta-analysis protocols (PRISMA-P) 2015 statement. . *Syst Rev* 2015.
40. Preamble to the Constitution of WHO as adopted by the International Health Conference. In: Organization WH, ed. Official Records of WHO, no 2, p 100. New York, 1946.
41. International Classification of Health Interventions Geneva: World Health Organization.
42. Flay BR, Biglan A, Boruch RF, et al. Standards of evidence: criteria for efficacy, effectiveness and dissemination. *Prev Sci* 2005;6(3):151-75.
43. Milat A, Newson R, King L, et al. A guide to scaling up population health interventions. *Public Health Research & Practice* 2016;26(1) doi: 10.17061/phrp2611604
44. Glanville J, Fleetwood K, Yellowlees A, et al. Development and Testing of Search Filters to Identify Economic Evaluations in MEDLINE and EMBASE. 2009. *Ottawa, ON: Canadian Agency for Drugs and Technologies in Health*



Economic evaluations of scaling up strategies of evidence-based health interventions: a systematic review protocol

45. Jacobsen E, Boyers D, Avenell A. Challenges of Systematic Reviews of Economic Evaluations: A Review of Recent Reviews and an Obesity Case Study. *Pharmacoeconomics* 2020;38(3):259-67. doi: 10.1007/s40273-019-00878-2
46. Wijnen B, Van Mastrigt G, Redekop W, et al. How to prepare a systematic review of economic evaluations for informing evidence-based healthcare decisions: data extraction, risk of bias, and transferability (part 3/3). *Expert Review of Pharmacoeconomics & Outcomes Research* 2016;16(6):723-32. doi: 10.1080/14737167.2016.1246961
47. Gerkens S, Crott R, Cleemput I, et al. Comparison of three instruments assessing the quality of economic evaluations: a practical exercise on economic evaluations of the surgical treatment of obesity. *Int J Technol Assess Health Care* 2008;24(3):318-25. doi: 10.1017/s0266462308080422 [published Online First: 2008/07/08]
48. Walker DG WR, Sharma R, et al. Best Practices for Conducting Economic Evaluations in Health Care: A Systematic Review of Quality Assessment Tools. *Rockville (MD): Agency for Healthcare Research and Quality (US)* 2012
49. Drummond MF, Jefferson TO. Guidelines for authors and peer reviewers of economic submissions to the BMJ. *BMJ* 1996;313(7052):275-83. doi: 10.1136/bmj.313.7052.275
50. Moynihan R, Johansson M, Maybee A, et al. Covid-19: an opportunity to reduce unnecessary healthcare. *BMJ* 2020;370:m2752. doi: 10.1136/bmj.m2752
51. Graham ID, Tetroe JM. The knowledge to action framework. *Models and frameworks for implementing evidence-based practice: Linking evidence to action* 2010;207:222.
52. Canadian Institute for Health Research. Ethics Guidance for Developing Partnerships with Patients and Researchers. Ottawa, 2020.

## PRISMA-P 2015 Checklist

This checklist has been adapted for use with protocol submissions to *Systematic Reviews* from Table 3 in Moher D et al: Preferred reporting items for systematic review and meta-analysis protocols (PRISMA-P) 2015 statement. *Systematic Reviews* 2015 4:1

| Section/topic                     | #  | Checklist item                                                                                                                                                                                  | Information reported                |                          | Page number(s)                                          |
|-----------------------------------|----|-------------------------------------------------------------------------------------------------------------------------------------------------------------------------------------------------|-------------------------------------|--------------------------|---------------------------------------------------------|
|                                   |    |                                                                                                                                                                                                 | Yes                                 | No                       |                                                         |
| <b>ADMINISTRATIVE INFORMATION</b> |    |                                                                                                                                                                                                 |                                     |                          |                                                         |
| <b>Title</b>                      |    |                                                                                                                                                                                                 |                                     |                          |                                                         |
| Identification                    | 1a | Identify the report as a protocol of a systematic review                                                                                                                                        | <input checked="" type="checkbox"/> | <input type="checkbox"/> | 1                                                       |
| Update                            | 1b | If the protocol is for an update of a previous systematic review, identify as such                                                                                                              | <input type="checkbox"/>            | <input type="checkbox"/> | N.a.                                                    |
| <b>Registration</b>               | 2  | If registered, provide the name of the registry (e.g., PROSPERO) and registration number in the Abstract                                                                                        | <input checked="" type="checkbox"/> | <input type="checkbox"/> | Open Access Framework. Registration number osf.io/fsq84 |
| <b>Authors</b>                    |    |                                                                                                                                                                                                 |                                     |                          |                                                         |
| Contact                           | 3a | Provide name, institutional affiliation, and e-mail address of all protocol authors; provide physical mailing address of corresponding author                                                   | <input checked="" type="checkbox"/> | <input type="checkbox"/> | 1                                                       |
| Contributions                     | 3b | Describe contributions of protocol authors and identify the guarantor of the review                                                                                                             | <input checked="" type="checkbox"/> | <input type="checkbox"/> | 10                                                      |
| <b>Amendments</b>                 | 4  | If the protocol represents an amendment of a previously completed or published protocol, identify as such and list changes; otherwise, state plan for documenting important protocol amendments | <input type="checkbox"/>            | <input type="checkbox"/> | N.a.                                                    |
| <b>Support</b>                    |    |                                                                                                                                                                                                 |                                     |                          |                                                         |
| Sources                           | 5a | Indicate sources of financial or other support for the review                                                                                                                                   | <input checked="" type="checkbox"/> | <input type="checkbox"/> | 10                                                      |
| Sponsor                           | 5b | Provide name for the review funder and/or sponsor                                                                                                                                               | <input checked="" type="checkbox"/> | <input type="checkbox"/> | 10                                                      |
| Role of sponsor/funder            | 5c | Describe roles of funder(s), sponsor(s), and/or institution(s), if any, in developing the protocol                                                                                              | <input checked="" type="checkbox"/> | <input type="checkbox"/> | 10                                                      |
| <b>INTRODUCTION</b>               |    |                                                                                                                                                                                                 |                                     |                          |                                                         |
| <b>Rationale</b>                  | 6  | Describe the rationale for the review in the context of what is already known                                                                                                                   | <input checked="" type="checkbox"/> | <input type="checkbox"/> | 4-5                                                     |

| Section/topic                             | #   | Checklist item                                                                                                                                                                                                                              | Information reported                |                          | Page number(s)          |
|-------------------------------------------|-----|---------------------------------------------------------------------------------------------------------------------------------------------------------------------------------------------------------------------------------------------|-------------------------------------|--------------------------|-------------------------|
|                                           |     |                                                                                                                                                                                                                                             | Yes                                 | No                       |                         |
| <b>Objectives</b>                         | 7   | Provide an explicit statement of the question(s) the review will address with reference to participants, interventions, comparators, and outcomes (PICO)                                                                                    | <input checked="" type="checkbox"/> | <input type="checkbox"/> | 5                       |
| <b>METHODS</b>                            |     |                                                                                                                                                                                                                                             |                                     |                          |                         |
| <b>Eligibility criteria</b>               | 8   | Specify the study characteristics (e.g., PICO, study design, setting, time frame) and report characteristics (e.g., years considered, language, publication status) to be used as criteria for eligibility for the review                   | <input checked="" type="checkbox"/> | <input type="checkbox"/> | 5-6                     |
| <b>Information sources</b>                | 9   | Describe all intended information sources (e.g., electronic databases, contact with study authors, trial registers, or other grey literature sources) with planned dates of coverage                                                        | <input checked="" type="checkbox"/> | <input type="checkbox"/> | 6-7                     |
| <b>Search strategy</b>                    | 10  | Present draft of search strategy to be used for at least one electronic database, including planned limits, such that it could be repeated                                                                                                  | <input checked="" type="checkbox"/> | <input type="checkbox"/> | 7, Supplementary file 2 |
| <b>STUDY RECORDS</b>                      |     |                                                                                                                                                                                                                                             |                                     |                          |                         |
| Data management                           | 11a | Describe the mechanism(s) that will be used to manage records and data throughout the review                                                                                                                                                | <input checked="" type="checkbox"/> | <input type="checkbox"/> | 7                       |
| Selection process                         | 11b | State the process that will be used for selecting studies (e.g., two independent reviewers) through each phase of the review (i.e., screening, eligibility, and inclusion in meta-analysis)                                                 | <input checked="" type="checkbox"/> | <input type="checkbox"/> | 7                       |
| Data collection process                   | 11c | Describe planned method of extracting data from reports (e.g., piloting forms, done independently, in duplicate), any processes for obtaining and confirming data from investigators                                                        | <input checked="" type="checkbox"/> | <input type="checkbox"/> | 7-8                     |
| <b>Data items</b>                         | 12  | List and define all variables for which data will be sought (e.g., PICO items, funding sources), any pre-planned data assumptions and simplifications                                                                                       | <input checked="" type="checkbox"/> | <input type="checkbox"/> | 8                       |
| <b>Outcomes and prioritization</b>        | 13  | List and define all outcomes for which data will be sought, including prioritization of main and additional outcomes, with rationale                                                                                                        | <input type="checkbox"/>            | <input type="checkbox"/> | N.a.                    |
| <b>Risk of bias in individual studies</b> | 14  | Describe anticipated methods for assessing risk of bias of individual studies, including whether this will be done at the outcome or study level, or both; state how this information will be used in data synthesis                        | <input checked="" type="checkbox"/> | <input type="checkbox"/> | 8                       |
| <b>DATA</b>                               |     |                                                                                                                                                                                                                                             |                                     |                          |                         |
| <b>Synthesis</b>                          | 15a | Describe criteria under which study data will be quantitatively synthesized                                                                                                                                                                 | <input type="checkbox"/>            | <input type="checkbox"/> | N.a.                    |
|                                           | 15b | If data are appropriate for quantitative synthesis, describe planned summary measures, methods of handling data, and methods of combining data from studies, including any planned exploration of consistency (e.g., $I^2$ , Kendall's tau) | <input type="checkbox"/>            | <input type="checkbox"/> | N.a.                    |

| Section/topic                            | #   | Checklist item                                                                                                              | Information reported                |                                     | Page number(s)                                                                                                           |
|------------------------------------------|-----|-----------------------------------------------------------------------------------------------------------------------------|-------------------------------------|-------------------------------------|--------------------------------------------------------------------------------------------------------------------------|
|                                          |     |                                                                                                                             | Yes                                 | No                                  |                                                                                                                          |
|                                          | 15c | Describe any proposed additional analyses (e.g., sensitivity or subgroup analyses, meta-regression)                         | <input type="checkbox"/>            | <input type="checkbox"/>            | N.a.                                                                                                                     |
|                                          | 15d | If quantitative synthesis is not appropriate, describe the type of summary planned                                          | <input checked="" type="checkbox"/> | <input type="checkbox"/>            | Descriptive structured narratives and descriptive statistics of key features of included economic evaluations<br><br>8-9 |
| <b>Meta-bias(es)</b>                     | 16  | Specify any planned assessment of meta-bias(es) (e.g., publication bias across studies, selective reporting within studies) | <input type="checkbox"/>            | <input checked="" type="checkbox"/> | N.a.                                                                                                                     |
| <b>Confidence in cumulative evidence</b> | 17  | Describe how the strength of the body of evidence will be assessed (e.g., GRADE)                                            | <input type="checkbox"/>            | <input checked="" type="checkbox"/> | N.a.                                                                                                                     |

Brundisini et al.

Economic evaluations of scaling up strategies of evidence-based health interventions: A systematic review protocol

Table. 1 - Search strategy in Ovid MEDLINE

**Medline-Ovid (2020-10-14)**

| <b>Concepts</b>                                               | <b>Search strategy keywords</b>                                                                                                                                                                                                                                                                                                               | <b>Search</b> |
|---------------------------------------------------------------|-----------------------------------------------------------------------------------------------------------------------------------------------------------------------------------------------------------------------------------------------------------------------------------------------------------------------------------------------|---------------|
| Scaling<br>(Controlled<br>Vocabulary)                         | "diffusion of innovation"/ or Organizational Innovation/                                                                                                                                                                                                                                                                                      | #1            |
| Scaling (Free<br>text)                                        | ("scal* up" or "scal* out").ab,kf,kw,ti.                                                                                                                                                                                                                                                                                                      | #2            |
|                                                               | (("scaling" or widespread or spread? or spreading or "rolling out" or "roll out" or "rolls out" or "rolled out" or upscaling or scalability or scalable) adj5 (innovation? or intervention? or technolog* or practice* or care or initiative* or program* or product? or therap* or service* or strateg* or change? or proces*)).ab,kf,kw,ti. | #3            |
|                                                               | ((bring* or brought or taking or take* or increas* or going or implement* or econom*) adj5 scal* adj5 (innovation? or intervention? or technolog* or practice* or care or initiative* or program* or product? or therap* or service* or strateg* or change? or proces*)).ab,kf,kw,ti.                                                         | #4            |
| Scaling (Free<br>text)                                        | 2 or 3 or 4                                                                                                                                                                                                                                                                                                                                   | #5            |
| Scaling                                                       | 1 or 5                                                                                                                                                                                                                                                                                                                                        | #6            |
| Economic<br>Evaluation<br>(Controlled<br>Vocabulary)          | "costs and cost analysis"/ or cost-benefit analysis/ or Economics, Dental/ or exp Economics, Hospital/ or Economics, Medical/ or Economics, Nursing/ or Economics, Pharmaceutical/                                                                                                                                                            | #7            |
| Economic<br>Evaluation<br>(Free text)                         | ("cost analysis" or "cost-benefit*" or "cost comparison*" or (cost* adj2 description*) or "cost-effective*" or "cost estimat*" or "cost minimization" or "cost-utility" or "Economic analys*" or "Economic evaluation*" or "net benefit*" or overhead or (value adj3 money)).ab,kf,kw,ti.                                                     | #8            |
| Economic<br>Evaluation                                        | 7 or 8                                                                                                                                                                                                                                                                                                                                        | #9            |
| Scaling AND<br>Economic<br>Evaluation                         | 6 and 9                                                                                                                                                                                                                                                                                                                                       | #10           |
| Scaling AND<br>Economic<br>Evaluation                         | Organizational Innovation/ec [Economics]                                                                                                                                                                                                                                                                                                      | #11           |
| Total Result                                                  | 10 or 11                                                                                                                                                                                                                                                                                                                                      | #12           |
| Filter for<br>abstract<br>comment,<br>editorial,<br>protocol, | academic dissertation/ or clinical conference/ or clinical trial protocol/ or comment/ or editorial/ or meeting abstract/                                                                                                                                                                                                                     | #13           |

Brundisini et al.

## Economic evaluations of scaling up strategies of evidence-based health interventions: A systematic review protocol

| Concepts                                                             | Search strategy keywords                                                                                                                                                                                   | Search |
|----------------------------------------------------------------------|------------------------------------------------------------------------------------------------------------------------------------------------------------------------------------------------------------|--------|
| theses<br>(Controlled Vocabulary)                                    |                                                                                                                                                                                                            |        |
| Filter for abstract comment, editorial, protocol, theses (Free text) | ("clinical conference*" or comment* or congress* or "consensus development conference*" or editorial or "english abstract*" or lecture*).pt.                                                               | #14    |
|                                                                      | (Comment* or editorial or Protocol).ti.                                                                                                                                                                    | #15    |
| Filter for abstract comment, editorial, protocol, theses             | 13 or 14 or 15                                                                                                                                                                                             | #16    |
| Without the filter for abstract comment, editorial, protocol, theses | 12 not 16                                                                                                                                                                                                  | #17    |
| Filter for Review (Controlled Vocabulary)                            | META-ANALYSIS/                                                                                                                                                                                             | #18    |
| Filter for Review (Free text)                                        | ("systematic review*" or "overview review*" or "literature review*" or "scoping review*" or meta-analy* or metaanaly* or meta-synthesis or metasynthesis or ((research or literature) adj3 synthesis)).ti. | #19    |
|                                                                      | (cinahl or (cochrane adj3 trial*) or embase or medline or psyclit or (psycinfo not "psycinfo database") or pubmed or scopus or "sociological abstracts" or "web of science").ab.                           | #20    |
|                                                                      | ("cochrane database of systematic reviews" or evidence report technology assessment or evidence report technology assessment summary).jn.                                                                  | #21    |
|                                                                      | ((review* or "Meta Analysis" or guideline* or "practice guideline*" or "systematic review*") not "Book review" ).pt.                                                                                       | #22    |
|                                                                      | 19 or 20 or 21 or 22                                                                                                                                                                                       | #23    |
| Filter for review                                                    | 18 or 23                                                                                                                                                                                                   | #24    |
| Without the filter for review                                        | 17 not 24                                                                                                                                                                                                  | #25    |

**Preliminary SCALECONOMICS CODEBOOK**

General instructions for codebook:

- Add '**not applicable**', '**not reported**' and '**unclear**' – for uncertain items that may promote review authors to contact study authors for clarification, especially on data items critical to reach conclusions.

| Data extraction variable                        | Value type              | Modality                | Description of variable                                          | Comments                                                                                        |
|-------------------------------------------------|-------------------------|-------------------------|------------------------------------------------------------------|-------------------------------------------------------------------------------------------------|
| Completed by                                    | Text                    | Free text               | Name of person extracting data                                   | State the name of person who has filled out the initial data extraction sheet                   |
| What is the reference number of this article?   | Numeric                 | Add reference ID number | Reference number of the record                                   | It will be available in the initial data extraction sheet                                       |
| <b>General study characteristics</b>            |                         |                         |                                                                  |                                                                                                 |
| First Author's last name                        | Text                    | Report: First author    | It is the family name of the first author                        | It will be available in the initial data extraction sheet                                       |
| Publication year                                | Text                    | Year                    | It is the year of paper's publication                            | It will be available in the initial data extraction sheet                                       |
| Link to the publication                         | Text                    | Add hyperlink           | It is the hyperlink for the paper's access                       | It will be available in the initial data extraction sheet                                       |
| Sources of funding                              | Categorical (Drop Down) | Stated                  | The name of institute that funded the study was reported or not. | Check in the paper if the name of institute that funded the study was reported or not.          |
|                                                 |                         | Not stated              |                                                                  |                                                                                                 |
| Competing interests                             | Categorical (Drop Down) | Stated                  | The competing interests were stated or not in the paper          | Check in the paper if the competing interests were stated or not in the paper                   |
|                                                 |                         | Not stated              |                                                                  |                                                                                                 |
| Specify competing interests (if any)            | Text                    | Free text               | It is the description of competing interests                     | Please, report the description of competing interests if available or NOT REPORT if unavailable |
| Publication type (journal paper, HTA, or other) | Categorical (Drop Down) | Journal                 | It is a classification of the publication type                   | Duplicate publications of the same study need to be linked together.                            |
|                                                 |                         | HTA report              |                                                                  |                                                                                                 |
|                                                 |                         | Other                   |                                                                  |                                                                                                 |

| Data extraction variable                                                         | Value type      | Modality                               | Description of variable                                                                                                                                                                                                                          | Comments                                                                         |
|----------------------------------------------------------------------------------|-----------------|----------------------------------------|--------------------------------------------------------------------------------------------------------------------------------------------------------------------------------------------------------------------------------------------------|----------------------------------------------------------------------------------|
| Publication type – Other: free-text                                              | Text            | Free text                              | It is a category other than Journal and HTA report.                                                                                                                                                                                              | Report type (if possible) and source                                             |
| Does the economic evaluation refer to a published checklist/tool (e.g., CHEERS)? | Multiple choice | No                                     | It is the published checklist was used or not for the study reporting                                                                                                                                                                            | Please report the information if available or NOT REPORTED if unavailable        |
|                                                                                  |                 | Yes – BMJ                              |                                                                                                                                                                                                                                                  |                                                                                  |
|                                                                                  |                 | Yes – CHEERS                           |                                                                                                                                                                                                                                                  |                                                                                  |
|                                                                                  |                 | Yes – QHEC                             |                                                                                                                                                                                                                                                  |                                                                                  |
|                                                                                  |                 | Yes – CHEC                             |                                                                                                                                                                                                                                                  |                                                                                  |
|                                                                                  |                 | Yes – Phillips                         |                                                                                                                                                                                                                                                  |                                                                                  |
|                                                                                  |                 | Yes – Drummond Ten-Point               |                                                                                                                                                                                                                                                  |                                                                                  |
|                                                                                  |                 | Yes – Modified Checklist (name)        |                                                                                                                                                                                                                                                  |                                                                                  |
|                                                                                  |                 | Yes – Other (name)                     |                                                                                                                                                                                                                                                  |                                                                                  |
|                                                                                  |                 | Not reported                           |                                                                                                                                                                                                                                                  |                                                                                  |
| Unclear                                                                          |                 |                                        |                                                                                                                                                                                                                                                  |                                                                                  |
| Other: Name and free-text description of published checklist/tool                | Text            | Free-text description                  | If checklist adapted from another checklist, please describe here which checklists they used and how.                                                                                                                                            | Please report the information if available or NOT REPORTED if unavailable        |
| <b>Population characteristics</b>                                                |                 |                                        |                                                                                                                                                                                                                                                  |                                                                                  |
| Population used for effect/cost data                                             | Multiple choice | Population delivering the intervention | The population of interest can be the population delivering the scaling up strategy (e.g., staff, health care workers, managers); the population of interest can also be the population receiving the intervention (e.g., patients, individuals) | Please, report UNCLEAR if it is not possible to say what population was studied. |
|                                                                                  |                 | Population receiving the intervention  |                                                                                                                                                                                                                                                  |                                                                                  |
|                                                                                  |                 | Both                                   |                                                                                                                                                                                                                                                  |                                                                                  |
|                                                                                  |                 | Unclear                                |                                                                                                                                                                                                                                                  |                                                                                  |



| Data extraction variable                                   | Value type | Modality                  | Description of variable                                                                                                                              | Comments                                                                                     |
|------------------------------------------------------------|------------|---------------------------|------------------------------------------------------------------------------------------------------------------------------------------------------|----------------------------------------------------------------------------------------------|
| Population used for effect/cost data - Other               | Text       | Free-text description     | Population benefiting from evidence-based practice                                                                                                   | Please report the information if available or NOT REPORTED if unavailable                    |
| Population size, #                                         | Integer    | Number of population size | Number of individuals included in the study                                                                                                          | Please report or calculate the information if available or NOT REPORTED if unavailable       |
| Population description (free-text)                         | Text       | Free-text description     | Description of population from which study participants are drawn.                                                                                   | As reported by authors                                                                       |
| Population sex                                             | Numeric    | Number of females         | It is the number of females in the study sample                                                                                                      | Please, report the number of females or NOT REPORTED if neither available nor calculable     |
|                                                            |            | Not reported              |                                                                                                                                                      |                                                                                              |
| Population age                                             | Numeric    | Number with one decimal   | It is the mean of age for the study sample                                                                                                           | Please, report the age mean if available or NOT REPORTED if neither available nor calculable |
| Ethnicity                                                  | Text       | Free-text description     | Ethnicity as a demographic factor                                                                                                                    | Describe as reported in text                                                                 |
| %Ethnicity                                                 | Numeric    | Number of Caucasians      | It is the number of Caucasians in the study sample                                                                                                   | Please, report the number of Caucasians or NOT REPORTED if neither available nor calculable  |
| Clinical problem                                           | Text       | Free-text description     | State the area(s) that the intervention targets (e.g., hypertension, oncology, preventive services). (Mark UNCLEAR if information is not available.) | Please report the information if available or NOT REPORTED if unavailable                    |
| Characteristics of participating providers: Profession     | Text       | Free-text description     | For example, physicians, nurses, pharmacists, physiotherapists, dentists, psychologists, mixed, etc.                                                 | If applicable.<br>If mixed, specify.                                                         |
| Characteristics of participating lay personnel: Profession | Text       | Free-text description     | For example, lay community workers                                                                                                                   | If applicable                                                                                |

Brundisini et al.

1  
2  
3  
4  
5  
6  
7  
8  
9  
10  
11  
12  
13  
14  
15  
16  
17  
18  
19  
20  
21  
22  
23  
24  
25  
26  
27  
28  
29  
30  
31  
32  
33  
34  
35  
36  
37  
38  
39  
40  
41  
42  
43  
44  
45  
46  
47

| Data extraction variable                                          | Value type | Modality              | Description of variable                                                                                                                                                                                                                                                                                                                                                                                                                                                                                                                                                                                                                                                                                                                                                  | Comments                                                           |
|-------------------------------------------------------------------|------------|-----------------------|--------------------------------------------------------------------------------------------------------------------------------------------------------------------------------------------------------------------------------------------------------------------------------------------------------------------------------------------------------------------------------------------------------------------------------------------------------------------------------------------------------------------------------------------------------------------------------------------------------------------------------------------------------------------------------------------------------------------------------------------------------------------------|--------------------------------------------------------------------|
| Characteristics of participating lay personnel: Level of training | Text       | Free-text description | It is the description of the training level for the participating lay personnel                                                                                                                                                                                                                                                                                                                                                                                                                                                                                                                                                                                                                                                                                          | If applicable                                                      |
| Characteristics of participating lay personnel: Other             | Text       | Free-text description | Other characteristics of the lay personnel part of the scaling up intervention                                                                                                                                                                                                                                                                                                                                                                                                                                                                                                                                                                                                                                                                                           | If applicable                                                      |
| <b>Intervention</b>                                               |            |                       |                                                                                                                                                                                                                                                                                                                                                                                                                                                                                                                                                                                                                                                                                                                                                                          |                                                                    |
| Scaling up strategy (free text)                                   | Text       | Free-text description | <p>It is the strategy used to scale the evidence-based intervention during the study.</p> <p>A scaling up strategy in healthcare is the "deliberate efforts to increase the impact of successfully tested health interventions so as to benefit more people and to foster policy and program development on a lasting basis." In other words, scaling up strategies are systematic courses of action that aim to roll out successful local health interventions to regional, national, or international levels to reach broader populations and settings over time.</p> <p>When scaling up interventions, most organisations need to adapt. Manage organisational change through processes such as staff retraining, mentoring, leadership development and coaching.</p> | Report the scaling up strategy as reported in text (if available). |

| Data extraction variable                                   | Value type                  | Modality                                   | Description of variable                                                                                                                                                                                   | Comments                                                                                                                               |
|------------------------------------------------------------|-----------------------------|--------------------------------------------|-----------------------------------------------------------------------------------------------------------------------------------------------------------------------------------------------------------|----------------------------------------------------------------------------------------------------------------------------------------|
| Vertical or horizontal scaling up strategy                 | Multiple choice (Drop down) | Vertical                                   | A vertical approach involves the introduction of an intervention simultaneously across a whole system and results in institutional change through policy, regulation, financing or health systems change. | There are two main approaches to scaling up. These approaches are not mutually exclusive, and a combination of approaches can be used. |
|                                                            |                             | Horizontal                                 | A horizontal approach involves the introduction of an intervention across different sites or groups in a phased manner.                                                                                   |                                                                                                                                        |
|                                                            |                             | Combination                                | Vertical + Horizontal                                                                                                                                                                                     |                                                                                                                                        |
|                                                            |                             | Unclear                                    |                                                                                                                                                                                                           |                                                                                                                                        |
| Vertical or horizontal scaling up strategy: Unclear        | Text                        | Free-text description                      | Unclear scaling up strategy                                                                                                                                                                               | Describe the strategy and why unclear                                                                                                  |
| Vertical or horizontal scaling up strategy: Other          | Text                        | Free-text description                      | Describe other types of scaling up strategies                                                                                                                                                             | If applicable.                                                                                                                         |
| Level or scope of the scaling up strategy                  | Multiple choice (Drop down) | National                                   | This item indicates how big the scope of the scaling up strategy.                                                                                                                                         | From a dropdown menu in Excel pick one (or more) of these items based on what is reported in the study.                                |
|                                                            |                             | Subnational (state/province/municipal)     |                                                                                                                                                                                                           |                                                                                                                                        |
|                                                            |                             | Multiple countries                         |                                                                                                                                                                                                           |                                                                                                                                        |
|                                                            |                             | Multiple subnational within single country |                                                                                                                                                                                                           |                                                                                                                                        |
| Scaling up of what type of health intervention             | Text                        | As described in record                     | Health intervention that is being scaled up                                                                                                                                                               | Please report the information if available or NOT REPORTED if unavailable                                                              |
| Scaling up of what type of health intervention (free text) | Text                        | Free-text description                      | Health intervention that is being scaled up                                                                                                                                                               | Please report the information if available or NOT REPORTED if unavailable                                                              |
| <b>Comparator</b>                                          |                             |                                            |                                                                                                                                                                                                           |                                                                                                                                        |

| Data extraction variable                             | Value type              | Modality                       | Description of variable                                                                                                                                                                                                                                                                                                                    | Comments                                                                 |
|------------------------------------------------------|-------------------------|--------------------------------|--------------------------------------------------------------------------------------------------------------------------------------------------------------------------------------------------------------------------------------------------------------------------------------------------------------------------------------------|--------------------------------------------------------------------------|
| Comparator                                           | Categorical (Drop Down) | Current practice (No scale up) | Type of comparator used in the economic evaluations.                                                                                                                                                                                                                                                                                       | Select one.                                                              |
|                                                      |                         | Other scaling up strategy/ies  |                                                                                                                                                                                                                                                                                                                                            |                                                                          |
| Comparator - Other                                   | Text                    | Free-text description          | Name & describe the comparator the other types of comparators/alternatives.                                                                                                                                                                                                                                                                | Please describe if other types of comparators are included in the study. |
| Comparator – Rationale for choice of the alternative | Text                    | Free-text description          | The rationale for the choice of the alternative programmes or interventions for comparison should be given.                                                                                                                                                                                                                                | Please report as in text if applicable.                                  |
| <b>Settings</b>                                      |                         |                                |                                                                                                                                                                                                                                                                                                                                            |                                                                          |
| Setting                                              | Text                    | Free-text description          | Healthcare setting (i.e., public health, primary care clinic, hospital, etc.) in both rural and urban areas                                                                                                                                                                                                                                | Describe the healthcare setting                                          |
| Country (ies) where study took place                 | Text                    | Free-text description          | Countries where the study took place                                                                                                                                                                                                                                                                                                       | Name the country/ies                                                     |
| <b>Study design</b>                                  |                         |                                |                                                                                                                                                                                                                                                                                                                                            |                                                                          |
| Type of economic evaluation                          |                         |                                |                                                                                                                                                                                                                                                                                                                                            |                                                                          |
| Cost-effectiveness analysis                          | Dichotomous             | Yes/No                         | CEA is a type of full economic evaluation in which the results are expressed in terms of the incremental cost per measured unit of each outcome (i.e., measures of resource use are valued, usually in monetary terms, but outcomes are not). Comparisons are thus limited to services or treatment options that produce the same outcome, | Please report the information if applicable                              |

| Data extraction variable | Value type  | Modality | Description of variable                                                                                                                                                                                                                                                                                                                                                                                                                                           | Comments                                    |
|--------------------------|-------------|----------|-------------------------------------------------------------------------------------------------------------------------------------------------------------------------------------------------------------------------------------------------------------------------------------------------------------------------------------------------------------------------------------------------------------------------------------------------------------------|---------------------------------------------|
|                          |             |          | which is measured strictly in one-dimensional, naturally occurring units. Interventions producing the same outcome are compared to assess the extent to which they may be judged favourably from an economic point of view. Cost-effectiveness analyses primarily address decisions relating to technical efficiency                                                                                                                                              |                                             |
| Cost-utility analysis    | Dichotomous | Yes/No   | CUA is a type of full economic evaluation in which the results are expressed in terms of the incremental cost per quality-adjusted life-year (QALY) (i.e., measures of resource use are valued in monetary terms and outcomes are valued in terms of QALYs –Quality-adjusted life-years) to allow comparisons of interventions within a given health system, in order to assess the extent to which they may be judged favourably from an economic point of view. | Please report the information if applicable |
| Cost-benefit analysis    | Dichotomous | Yes/No   | CBA is a type of full economic evaluation in which measures of both resource use and beneficial (and adverse) effects are valued in commensurate (often monetary) units, so that the costs and benefits of alternative interventions can be directly                                                                                                                                                                                                              | Please report the information if applicable |

1  
2  
3  
4  
5  
6  
7  
8  
9  
10  
11  
12  
13  
14  
15  
16  
17  
18  
19  
20  
21  
22  
23  
24  
25  
26  
27  
28  
29  
30  
31  
32  
33  
34  
35  
36  
37  
38  
39  
40  
41  
42  
43  
44  
45  
46  
47

| Data extraction variable      | Value type  | Modality | Description of variable                                                                                                                                                                                                                                              | Comments                                    |
|-------------------------------|-------------|----------|----------------------------------------------------------------------------------------------------------------------------------------------------------------------------------------------------------------------------------------------------------------------|---------------------------------------------|
|                               |             |          | compared to assess the extent to which interventions may be judged favourably from an economic point of view. Results may be expressed in terms of an incremental cost-benefit ratio or incremental net benefit.                                                     |                                             |
| Cost-minimization             | Dichotomous | Yes/No   | It is sometimes argued that if the two or more alternatives under consideration achieve the given outcome to the same extent, a cost-minimization analysis (CMA) can be performed. However, it is not appropriate to view CMA as a form of full economic evaluation. | Please report the information if applicable |
| Cost comparison/cost analysis | Dichotomous | Yes/No   | Approach that describes, measures and values resource use (costs) associated with alternative interventions.                                                                                                                                                         | Please report the information if applicable |
| Cost outcome descriptions     | Dichotomous | Yes/No   | Approach that describes, measures and values resource use (costs) and consequences (outcomes) associated with a single intervention, with no comparison between alternatives.                                                                                        | Please report the information if applicable |
| Cost descriptions             | Dichotomous | Yes/No   | Approach that describes, measures and values resource use (costs) associated with a                                                                                                                                                                                  | Please report the information if applicable |

| Data extraction variable | Value type  | Modality | Description of variable                                                                                                                                                                                                                                                      | Comments                                                                                                                                                                                                                                                                                                                                                                                                                                                              |
|--------------------------|-------------|----------|------------------------------------------------------------------------------------------------------------------------------------------------------------------------------------------------------------------------------------------------------------------------------|-----------------------------------------------------------------------------------------------------------------------------------------------------------------------------------------------------------------------------------------------------------------------------------------------------------------------------------------------------------------------------------------------------------------------------------------------------------------------|
|                          |             |          | single intervention, with no comparison between alternatives.                                                                                                                                                                                                                |                                                                                                                                                                                                                                                                                                                                                                                                                                                                       |
| Budget impact analysis   | Dichotomous | Yes/No   | A BIA addresses the expected changes in the expenditure of a healthcare system after the adoption of a new intervention. A BIA can also be used for budget or resource planning. A BIA can be free standing or part of a comprehensive economic assessment along with a CEA. | Please report the information if applicable                                                                                                                                                                                                                                                                                                                                                                                                                           |
| Trial-based              | Dichotomous | Yes/No   | The use of clinical studies (such as randomised trials) as vehicles for economic evaluation.                                                                                                                                                                                 | Please report the information if applicable                                                                                                                                                                                                                                                                                                                                                                                                                           |
| Model-based              | Dichotomous | Yes/No   | Economic evaluation using decision analytic models, where data from a number of different sources are brought together.                                                                                                                                                      | Please report the information if applicable                                                                                                                                                                                                                                                                                                                                                                                                                           |
| Methodological           | Dichotomous | Yes/No   | We define methodological papers as the presentation and critique of new approaches, changes to existing methods or the discussion of quantitative and data analytic approaches that are relevant to economic evaluation of scaling up strategies.                            | Overall, methodological papers can: <ul style="list-style-type: none"> <li>• Outline and review a new analytical approach that has recently been, or has potential to be, applied</li> <li>• Provide a detailed description, using some empirical examples, of the application of a new technique/method (such as, but need not necessarily be, a quantitative technique)</li> <li>• Examine a particular method which might benefit from a methodological</li> </ul> |

| Data extraction variable                                   | Value type              | Modality                  | Description of variable                                                                                           | Comments                                                                                                                                                                                 |
|------------------------------------------------------------|-------------------------|---------------------------|-------------------------------------------------------------------------------------------------------------------|------------------------------------------------------------------------------------------------------------------------------------------------------------------------------------------|
|                                                            |                         |                           |                                                                                                                   | re-think or a methodological re-think based on its application in a new area of research, trying to address gaps and limitations of the methodology/method itself.                       |
| Type of economic evaluation - Other                        | Text                    | Free-text description     | Other (such a modified approaches).                                                                               | Please describe.                                                                                                                                                                         |
| If the study is model based, what is the model type:       | Categorical (Drop Down) | Markov                    | Detail any model used (e.g., Markov, Decision Tree, and Discrete Event Simulation).                               | Please report the information if available                                                                                                                                               |
|                                                            |                         | Decision Tree             |                                                                                                                   |                                                                                                                                                                                          |
|                                                            |                         | Discrete Event Simulation |                                                                                                                   |                                                                                                                                                                                          |
|                                                            |                         | Microsimulation model     |                                                                                                                   |                                                                                                                                                                                          |
|                                                            |                         | Other                     |                                                                                                                   |                                                                                                                                                                                          |
| If the study is model based, what is the model type: Other | Text                    | Free-text description     | It is the description of the model type other than Markov, Decision Tree, and Discrete Event Simulation           | Please report the information if applicable                                                                                                                                              |
| <b>Methods</b>                                             |                         |                           |                                                                                                                   |                                                                                                                                                                                          |
| Perspective – What is the perspective of the analysis?     | Multiple choice         | Society                   | State the viewpoint of the analysis.                                                                              | You can select more than one (as reported in the study). If not specified, it can often be guessed when reading the study. Please report “not specified” the information was unavailable |
|                                                            |                         | Health-system             |                                                                                                                   |                                                                                                                                                                                          |
|                                                            |                         | Care provider             |                                                                                                                   |                                                                                                                                                                                          |
|                                                            |                         | Insurer                   |                                                                                                                   |                                                                                                                                                                                          |
|                                                            |                         | Hospital                  |                                                                                                                   |                                                                                                                                                                                          |
|                                                            |                         | Patient                   |                                                                                                                   |                                                                                                                                                                                          |
|                                                            |                         | Other (describe)          |                                                                                                                   |                                                                                                                                                                                          |
| Not specified                                              |                         |                           |                                                                                                                   |                                                                                                                                                                                          |
| Perspective - other                                        | Text                    | Free-text description     | It is the perspective description other than society, health system, care provider, insurer, hospital and patient | Please, report the information if available. If not present, mark UNCLEAR.                                                                                                               |

1  
2  
3  
4  
5  
6  
7  
8  
9  
10  
11  
12  
13  
14  
15  
16  
17  
18  
19  
20  
21  
22  
23  
24  
25  
26  
27  
28  
29  
30  
31  
32  
33  
34  
35  
36  
37  
38  
39  
40  
41  
42  
43  
44  
45  
46  
47



| Data extraction variable                                                             | Value type | Modality                          | Description of variable                                                                                                                           | Comments                                                                                                 |
|--------------------------------------------------------------------------------------|------------|-----------------------------------|---------------------------------------------------------------------------------------------------------------------------------------------------|----------------------------------------------------------------------------------------------------------|
| Perspective – Justification                                                          | Text       | Free-text description             | A clear justification should be given for the form(s) of evaluation chosen in relation to the question(s) being addressed.                        | Please, report the information if available                                                              |
| Time horizon (years & months) - benefits                                             | Integer    | Number of years, number of months | State the time horizon for benefits.                                                                                                              | Please indicated whether the number is in years/months. Write “Unclear” if not clear from the text.      |
| Time horizon (years & months) - costs                                                | Integer    | Number of years, number of months | State the time horizon for costs                                                                                                                  | Please indicated whether the number is in years/months. Write “Unclear” if not clear from the text.      |
| <b>Costs</b>                                                                         |            |                                   |                                                                                                                                                   |                                                                                                          |
| Evidence-based health intervention costs                                             | Text       | Free-text description             | Provide details about which costs are being reported (e.g., medication costs, transportation)                                                     | Add if included                                                                                          |
| Methods for identifying resource use – clinical (evidence-based intervention)        | Text       | Free-text description             | Describe the methods used to identify resource use (e.g., questionnaire, survey, cost dairies, expert consultation, and formal consensus methods) | Add if included                                                                                          |
| Assumptions of the measurement of resources – clinical (evidence-based intervention) | Text       | Free-text description             | Describe all structural or other assumptions underpinning the decision-analytic model.                                                            | Describe, for instance, assumptions for the imputation method when incomplete measurement occurred       |
| Scaling up strategy costs                                                            | Text       | Free-text description             | Provide details about which costs are being reported (medication costs, transportation, etc.)                                                     | Add if included – this should include the costs related to the implementation of the scaling up strategy |
| Methods for identifying resource use – scaling up                                    | Text       | Free-text description             | Provide details of the methods used to identify resource use                                                                                      |                                                                                                          |

| Data extraction variable                                 | Value type              | Modality               | Description of variable                                                                                                                           | Comments                                                                                                                                                                                                                                                                                  |
|----------------------------------------------------------|-------------------------|------------------------|---------------------------------------------------------------------------------------------------------------------------------------------------|-------------------------------------------------------------------------------------------------------------------------------------------------------------------------------------------------------------------------------------------------------------------------------------------|
| Assumptions of the measurement of resources – scaling up | Text                    | Free-text description  | Describe all structural or other assumptions underpinning the decision-analytic model.                                                            | Describe, for instance, assumptions for the imputation method when incomplete measurement occurred                                                                                                                                                                                        |
| <b>Measurement of costs</b>                              |                         |                        |                                                                                                                                                   |                                                                                                                                                                                                                                                                                           |
| Methods used to calculate unit costs                     | Text                    | Free-text description  | Describe the methods used to identify relevant unit costs (guidelines, own cost price calculations, and literature). Mark UNCLEAR if missing.     | Add if included.                                                                                                                                                                                                                                                                          |
| Cost estimation methods                                  | Categorical (Drop Down) | Micro-costing          | Methods used to estimate costs.                                                                                                                   | Add if included.                                                                                                                                                                                                                                                                          |
|                                                          |                         | Gross costing          |                                                                                                                                                   |                                                                                                                                                                                                                                                                                           |
|                                                          |                         | Hybrid                 |                                                                                                                                                   |                                                                                                                                                                                                                                                                                           |
|                                                          |                         | Other (describe)       |                                                                                                                                                   |                                                                                                                                                                                                                                                                                           |
| Not specified                                            |                         |                        |                                                                                                                                                   |                                                                                                                                                                                                                                                                                           |
| Cost estimation method - other                           | Text                    | Free-text description  | It is the cost estimation method other than macro-costing, gross costing, hybrid.                                                                 | Please, report the information if applicable                                                                                                                                                                                                                                              |
| <b>Valuing costs</b>                                     |                         |                        |                                                                                                                                                   |                                                                                                                                                                                                                                                                                           |
| What is the currency?                                    | Text                    | Free-text description  | Currency used in analysis.                                                                                                                        | Please write the currency used for the analysis, and also whether there was any conversion (indicating the converted currency).                                                                                                                                                           |
| What is the year of pricing?                             | Integer                 | Number of pricing year | Year of pricing                                                                                                                                   | Please, report the information if applicable                                                                                                                                                                                                                                              |
| <b>Health intervention effectiveness outcomes</b>        |                         |                        |                                                                                                                                                   |                                                                                                                                                                                                                                                                                           |
| Clinical outcomes - health benefits in natural units     | Numeric & Text          | Free-text description  | Specify number and type of natural units such as, for example, life years gained, disability days saved, points of blood pressure reduction, etc. | Add if applicable – Add in the way and measure presented in the study. If possible, when reporting the study outcomes, it is preferred to report the degree of uncertainty; therefore, in addition to reporting the mean (or median), a standard deviation (or range) should be reported. |

| Data extraction variable                                                   | Value type                  | Modality                                        | Description of variable                                                           | Comments                                                                                                                                                                                                                                                                                  |
|----------------------------------------------------------------------------|-----------------------------|-------------------------------------------------|-----------------------------------------------------------------------------------|-------------------------------------------------------------------------------------------------------------------------------------------------------------------------------------------------------------------------------------------------------------------------------------------|
| Clinical outcomes - health benefits in monetary values                     | Numeric & Text              | Free-text description                           | Specify number of monetary values.                                                | Add if applicable – Add in the way and measure presented in the study. If possible, when reporting the study outcomes, it is preferred to report the degree of uncertainty; therefore, in addition to reporting the mean (or median), a standard deviation (or range) should be reported. |
| Health utility values - health benefits in utility values                  | Numeric & text              | Free-text description                           | Add values and utility measure, such as QALYs                                     | If applicable                                                                                                                                                                                                                                                                             |
| Patient-level outcomes (in natural units)                                  | Numeric & Text              | Free-text description                           | Add if included – Add in the way and measure presented in the study               | If applicable                                                                                                                                                                                                                                                                             |
| System-level outcomes (in natural units)                                   | Numeric & Text              | Free-text description                           | Add if included– Add in the way and measure presented in the study                | If applicable                                                                                                                                                                                                                                                                             |
| <b>Health intervention effectiveness outcomes – Data sources</b>           |                             |                                                 |                                                                                   |                                                                                                                                                                                                                                                                                           |
| Source of effectiveness data of evidence-based health intervention         | Multiple choice (Drop Down) | Trials                                          | It is the data source for the effectiveness of evidence-based health intervention | If applicable                                                                                                                                                                                                                                                                             |
|                                                                            |                             | Observational studies                           |                                                                                   |                                                                                                                                                                                                                                                                                           |
|                                                                            |                             | Published literature (e.g., systematic reviews) |                                                                                   |                                                                                                                                                                                                                                                                                           |
|                                                                            |                             | Administrative data                             |                                                                                   |                                                                                                                                                                                                                                                                                           |
|                                                                            |                             | Clinical databases                              |                                                                                   |                                                                                                                                                                                                                                                                                           |
|                                                                            |                             | Medical records                                 |                                                                                   |                                                                                                                                                                                                                                                                                           |
|                                                                            |                             | Expert opinion                                  |                                                                                   |                                                                                                                                                                                                                                                                                           |
|                                                                            |                             | Observations                                    |                                                                                   |                                                                                                                                                                                                                                                                                           |
| Other                                                                      |                             |                                                 |                                                                                   |                                                                                                                                                                                                                                                                                           |
| Source of effectiveness data of evidence-based health intervention – Other | Text                        | Free-text description                           | It is the data source other than the ones listed                                  | If applicable                                                                                                                                                                                                                                                                             |
| Year range of primary studies                                              | Integer                     | Number of years                                 | Year range                                                                        | Add if applicable                                                                                                                                                                                                                                                                         |
| <b>Health intervention effectiveness outcomes - measurement</b>            |                             |                                                 |                                                                                   |                                                                                                                                                                                                                                                                                           |

| Data extraction variable                                                                                     | Value type | Modality              | Description of variable                                                                            | Comments                                                                                                                                                                                                                                                                                                                                                                                                                                                                                                           |
|--------------------------------------------------------------------------------------------------------------|------------|-----------------------|----------------------------------------------------------------------------------------------------|--------------------------------------------------------------------------------------------------------------------------------------------------------------------------------------------------------------------------------------------------------------------------------------------------------------------------------------------------------------------------------------------------------------------------------------------------------------------------------------------------------------------|
| Methods of measurement of effects                                                                            | Text       | Free-text description | Specify source of effectiveness estimates (e.g., stated WTP, revealed WTP, and conjoint analysis). | If applicable                                                                                                                                                                                                                                                                                                                                                                                                                                                                                                      |
| Methods of valuation of effects                                                                              | Text       | Free-text description | Specify methods of valuation of effects (e.g., indirect or direct measurement).                    | If applicable                                                                                                                                                                                                                                                                                                                                                                                                                                                                                                      |
| Methods used for the synthesis of clinical effectiveness data - single experimental or nonexperimental study | Text       | Free-text description | Describe fully the methods used for the synthesis of clinical effectiveness data                   | If the economic evaluation is based on a single experimental or non-experimental study with patient-level data → then report: information on methods of selection of the study population; methods of allocation of study subjects; whether intention-to-treat analysis was used; methods for handling missing data; the time horizon over which patients were followed up and assessed; and, where appropriate, methods for handling potential biases introduced from study design, for example, selection biases |
| Methods used for the synthesis of clinical effectiveness data - Synthesis-based economic evaluation          | Text       | Free-text description | Describe fully the methods used for the synthesis of clinical effectiveness data                   | If synthesis-based economic evaluation → Report a reference to the study, and information on the strategy adopted to search and select relevant evidence, as well as information related to potential bias arising from study selection and synthesis methods. In addition, it may require reporting of long-term extrapolation methods.                                                                                                                                                                           |

| Data extraction variable                                      | Value type                  | Modality                                        | Description of variable                                                                                                                                                                     | Comments                                                                                                                                                                                                                                                                    |
|---------------------------------------------------------------|-----------------------------|-------------------------------------------------|---------------------------------------------------------------------------------------------------------------------------------------------------------------------------------------------|-----------------------------------------------------------------------------------------------------------------------------------------------------------------------------------------------------------------------------------------------------------------------------|
| <b>Scaling strategy effectiveness outcomes</b>                |                             |                                                 |                                                                                                                                                                                             |                                                                                                                                                                                                                                                                             |
| Scaling up strategies' outcomes                               | Text                        | Free-text description                           | Scaling up strategies' implementation outcomes (see Milat, MacLean, Simons): coverage, acceptability adoption, appropriateness, costs feasibility, fidelity penetration, and sustainability | <b>(Not exhaustive, please be open to other types of outcomes present in the literature under review)</b> LIST of POTENTIAL SCLAING UP STRATEGY EFFECTIVENESS OUTCOMES: Acceptability, Adoption, Appropriateness, Feasibility, Fidelity, Penetration, Sustainability, Reach |
| Scaling up strategies' outcomes - Other                       | Text                        | Free-text description                           | It is the description of scaling up outcome other than the ones listed above                                                                                                                | Please report the information if applicable                                                                                                                                                                                                                                 |
| <b>Scaling strategy effectiveness outcomes – Data sources</b> |                             |                                                 |                                                                                                                                                                                             |                                                                                                                                                                                                                                                                             |
| Source of effectiveness data of scaling up strategy           | Multiple choice (Drop Down) | Trials                                          | It is the data source for the effectiveness of scaling up strategy                                                                                                                          | If applicable                                                                                                                                                                                                                                                               |
|                                                               |                             | Observational studies                           |                                                                                                                                                                                             |                                                                                                                                                                                                                                                                             |
|                                                               |                             | Published literature (e.g., systematic reviews) |                                                                                                                                                                                             |                                                                                                                                                                                                                                                                             |
|                                                               |                             | Administrative data                             |                                                                                                                                                                                             |                                                                                                                                                                                                                                                                             |
|                                                               |                             | Clinical databases                              |                                                                                                                                                                                             |                                                                                                                                                                                                                                                                             |
|                                                               |                             | Medical records                                 |                                                                                                                                                                                             |                                                                                                                                                                                                                                                                             |
|                                                               |                             | Expert opinion                                  |                                                                                                                                                                                             |                                                                                                                                                                                                                                                                             |
|                                                               |                             | Observations                                    |                                                                                                                                                                                             |                                                                                                                                                                                                                                                                             |
| Other                                                         |                             |                                                 |                                                                                                                                                                                             |                                                                                                                                                                                                                                                                             |
| Source of effectiveness data of scaling up strategy - Other   | Text                        | Free-text description                           | It is the data source other than the ones listed above.                                                                                                                                     | Please report the information if applicable                                                                                                                                                                                                                                 |
| <b>Scaling strategy effectiveness outcomes - measurement</b>  |                             |                                                 |                                                                                                                                                                                             |                                                                                                                                                                                                                                                                             |
| Methods of measurement of effects                             | Text                        | Free-text description                           | Specify source of effectiveness estimates ( <i>whether from one single study or a synthesis</i> )                                                                                           | Please, report the information if available OR NOT report if unavailable                                                                                                                                                                                                    |
| Methods used for the synthesis of effectiveness data          | Text                        | Free-text description                           | Specify methods for the synthesis of effectiveness estimates ( <i>This</i>                                                                                                                  | Please, report the information if available OR NOT report if unavailable                                                                                                                                                                                                    |

1  
2  
3  
4  
5  
6  
7  
8  
9  
10  
11  
12  
13  
14  
15  
16  
17  
18  
19  
20  
21  
22  
23  
24  
25  
26  
27  
28  
29  
30  
31  
32  
33  
34  
35  
36  
37  
38  
39  
40  
41  
42  
43  
44  
45  
46  
47

| Data extraction variable                                                             | Value type      | Modality                         | Description of variable                                                                                                                                                                                                                                                                                                                               | Comments                                                                                        |
|--------------------------------------------------------------------------------------|-----------------|----------------------------------|-------------------------------------------------------------------------------------------------------------------------------------------------------------------------------------------------------------------------------------------------------------------------------------------------------------------------------------------------------|-------------------------------------------------------------------------------------------------|
|                                                                                      |                 |                                  | <i>one I am not sure how it would look like)</i>                                                                                                                                                                                                                                                                                                      |                                                                                                 |
| <b>Analysis</b>                                                                      |                 |                                  |                                                                                                                                                                                                                                                                                                                                                       |                                                                                                 |
| Statistical methods used                                                             | Text            | Free-text description            | Describe all analytical methods supporting the evaluation. This could include methods for dealing with skewed, missing, or censored data; extrapolation methods; methods for pooling data; approaches to validate or make adjustments (such as half cycle corrections) to a model; and methods for handling population heterogeneity and uncertainty. | The analytic strategy should be fully explained as part of the "Methods" section of the article |
| <b>Modeling Methods – PLEASE NOTE: THIS SECTION APPLIES ONLY TO MODELING STUDIES</b> |                 |                                  |                                                                                                                                                                                                                                                                                                                                                       |                                                                                                 |
| Source of data incorporated into the model:                                          | Multiple choice | Data collected alongside a trial | Sources of data used in the model                                                                                                                                                                                                                                                                                                                     | Please, select all that apply                                                                   |
|                                                                                      |                 | Population survey                |                                                                                                                                                                                                                                                                                                                                                       |                                                                                                 |
|                                                                                      |                 | Cohort study                     |                                                                                                                                                                                                                                                                                                                                                       |                                                                                                 |
|                                                                                      |                 | Before and after study           |                                                                                                                                                                                                                                                                                                                                                       |                                                                                                 |
|                                                                                      |                 | Expert opinion                   |                                                                                                                                                                                                                                                                                                                                                       |                                                                                                 |
| Other                                                                                |                 |                                  |                                                                                                                                                                                                                                                                                                                                                       |                                                                                                 |
| If from trial – identification of original study                                     | Text            | Free-text description            | Study from which participants are drawn, please report                                                                                                                                                                                                                                                                                                | Please, report the information if applicable                                                    |
| If from trial – characteristics of participants in trial                             | Text            | Free-text description            | Report number, sex, and mean age of participants included in trial                                                                                                                                                                                                                                                                                    | Please, report the information if applicable                                                    |
| Source of data incorporated into the model - Assumptions made:                       | Dichotomous     | Yes/No                           | Did the authors make assumptions about the sources of data                                                                                                                                                                                                                                                                                            | Please, report the information if applicable                                                    |

| Data extraction variable                                                              | Value type  | Modality              | Description of variable                                                                                                                                                                       | Comments                                                                                                                                                                                                                                      |
|---------------------------------------------------------------------------------------|-------------|-----------------------|-----------------------------------------------------------------------------------------------------------------------------------------------------------------------------------------------|-----------------------------------------------------------------------------------------------------------------------------------------------------------------------------------------------------------------------------------------------|
| Source of data incorporated into the model - Assumptions made: If the answer is "Yes" | Text        | Free-text description | If assumptions made please specify.                                                                                                                                                           | Please, report the information if applicable                                                                                                                                                                                                  |
| Reasons for the specific model used                                                   | Text        | Free-text description | Report reasons if described.                                                                                                                                                                  | Please, report the information if applicable                                                                                                                                                                                                  |
| Statistical assumptions                                                               | Text        | Free-text description | Please specify statistical assumptions used in the model                                                                                                                                      | Please, report the information if applicable                                                                                                                                                                                                  |
| Statistical tests used                                                                | Text        | Free-text description | Please specify what statistical tests were used in the model                                                                                                                                  | For model-based economic evaluations, authors should describe and report how they estimated parameters, for example, how they transformed transition probabilities between events or health states into functions of age or disease severity. |
| <b>Results</b>                                                                        |             |                       |                                                                                                                                                                                               |                                                                                                                                                                                                                                               |
| Were findings reported as incremental costs?                                          | Dichotomous | Yes/No                | Incremental costs refer to the additional costs associated with an intervention in comparison to a specified comparator.                                                                      | Please, report the information if applicable                                                                                                                                                                                                  |
| Were findings reported as incremental effectiveness?                                  | Dichotomous | Yes/No                | Note that the results of such comparisons may be stated either in terms of incremental cost per unit of effect, or in terms of effects per unit of cost (life-years gained per dollar spent). | Please, report the information if applicable                                                                                                                                                                                                  |
| Net costs reported                                                                    | Numeric     | Numeric-value         | It is the value reported for the net costs                                                                                                                                                    | If added                                                                                                                                                                                                                                      |
| Net benefits (outcomes) reported                                                      | Numeric     | Numeric-value         | It is the value reported for the net benefits                                                                                                                                                 | If added                                                                                                                                                                                                                                      |
| Cost-benefit ratio                                                                    | Numeric     | Numeric-value         | It is the value reported for the cost-benefits                                                                                                                                                | If added                                                                                                                                                                                                                                      |
| Incremental cost-effectiveness ratios (ICER, ICUR) reported                           | Numeric     | Numeric-value         | ICER. ICUR                                                                                                                                                                                    | If added                                                                                                                                                                                                                                      |

| Data extraction variable                                                                            | Value type     | Modality              | Description of variable                                                                                                                                                                                                                              | Comments                                     |
|-----------------------------------------------------------------------------------------------------|----------------|-----------------------|------------------------------------------------------------------------------------------------------------------------------------------------------------------------------------------------------------------------------------------------------|----------------------------------------------|
| Confidence intervals (e.g., 95 % CI) of incremental cost-effectiveness ratios (ICER, ICUR) reported | Numeric        | Numeric-value         | It is the confidence value of economic parameter reported                                                                                                                                                                                            | If added                                     |
| Category or type of costs included in cost analysis and costs per category/type                     | Numeric & Text | Free-text description | Cost description of the type or category of cost; please specify (if available) whether the studies includes both (or only) direct and direct costs of the intervention.                                                                             | Please, report the information if applicable |
| Results of cost-description studies                                                                 | Numeric & Text | Free-text description | Description of costs per unit of analysis                                                                                                                                                                                                            | Please, report the information if applicable |
| Results of cost-outcome descriptions                                                                | Numeric & Text | Free-text description | Description of costs and outcomes of one intervention (no alternative)                                                                                                                                                                               | Please, report the information if applicable |
| <b>Analyses of uncertainty</b>                                                                      |                |                       |                                                                                                                                                                                                                                                      |                                              |
| Was analysis of uncertainty done?                                                                   | Dichotomous    | Yes/No                | Sensitivity analysis is an exploration of the impact on the results of changing the value of one (or more) parameter(s) while keeping the values of all other parameters unchanged.                                                                  | Please, report the information if applicable |
| Analyses of uncertainty (e.g., sensitivity analyses) - Type                                         | Text           | Free-text description | Describe the type of analyses of uncertainty (e.g., statistical comparison, bootstrapping, sensitivity analysis [one-way, multiway], threshold analysis, analysis of extremes, and best/worst case analysis) and probabilistic sensitivity analysis. | Please, report the information if applicable |
| Intervention parameters examined in uncertainty analysis                                            | Text           | Free-text description | List intervention parameters examined in uncertainty analysis                                                                                                                                                                                        | Please, report the information if applicable |



| Data extraction variable                                                                | Value type  | Modality              | Description of variable                                                                                                                                                                                                      | Comments                                     |
|-----------------------------------------------------------------------------------------|-------------|-----------------------|------------------------------------------------------------------------------------------------------------------------------------------------------------------------------------------------------------------------------|----------------------------------------------|
| Outcome(s) of analyses of sensitivity analyses [Single study-based economic evaluation] | Text        | Free-text description | Describe the effects of sampling uncertainty for the estimated incremental cost and incremental effectiveness parameters, together with the impact of methodological assumptions (such as discount rate, study perspective). | If applicable. Describe as reported.         |
| Outcome(s) of analyses of sensitivity analyses [Model-based economic evaluation]        | Text        | Free-text description | Describe the effects on the results of uncertainty for all input parameters, and uncertainty related to the structure of the model and assumptions.                                                                          | If applicable. Describe as reported.         |
| <b>Calibration</b>                                                                      |             |                       |                                                                                                                                                                                                                              |                                              |
| Was a description of the data that the model was calibrated to provided?                | Dichotomous | Yes/No                | It is the description of the data that the model was calibrated to provide                                                                                                                                                   | Please, report the information if applicable |
| Were details of the data that the model was fit to provided?                            | Text        | Free-text description | Details for the data that the model was fit                                                                                                                                                                                  | Please, report the information if applicable |
| Was the model calibrated to equilibrium or trends?                                      | Dichotomous | Yes/No                | It is to check if the model was calibrated or not                                                                                                                                                                            | Please, report the information if applicable |
| What was the model calibration approach                                                 | Text        | Free-text description | Target-fitting, minimize least squares, Bayesian, etc.                                                                                                                                                                       | Please, report the information if applicable |
| What was the model calibrated to                                                        | Text        | Free-text description | List the data types (disease prevalence in each group, etc.)                                                                                                                                                                 | Please, report the information if applicable |
| What parameters were calibrated?                                                        | Text        | Free-text description | List the parameters that were calibrated (uptake, etc.)                                                                                                                                                                      | Please, report the information if applicable |
| <b>Discounting</b>                                                                      |             |                       |                                                                                                                                                                                                                              |                                              |
| Discount rate                                                                           | Dichotomous | Yes/No                | Was discounting performed?                                                                                                                                                                                                   | Please, report the information if applicable |
| Discount rate for costs                                                                 | Numeric     | %                     | What was the discount rate for the cost(s)?                                                                                                                                                                                  | Please, report the information if applicable |

1  
2  
3  
4  
5  
6  
7  
8  
9  
10  
11  
12  
13  
14  
15  
16  
17  
18  
19  
20  
21  
22  
23  
24  
25  
26  
27  
28  
29  
30  
31  
32  
33  
34  
35  
36  
37  
38  
39  
40  
41  
42  
43  
44  
45  
46  
47

| Data extraction variable                                  | Value type  | Modality              | Description of variable                                                                                                  | Comments                                     |
|-----------------------------------------------------------|-------------|-----------------------|--------------------------------------------------------------------------------------------------------------------------|----------------------------------------------|
| Discount rate for effects                                 | Numeric     | %                     | What was the discount rate for the effect(s)? (i.e., the rate used to account for different timing of costs and effects) | Please, report the information if applicable |
| Inflation rate                                            | Dichotomous | Yes/No                | Was adjustment for inflation performed if unit costs stemmed from different years?                                       | Please, report the information if applicable |
| Data collection year                                      | Integer     | Year                  | Specify year.                                                                                                            | Please, report the information if applicable |
| Limitations of methodology used for discounting           | Text        | Free-text description | Report limitations as described in text.                                                                                 | If authors report this.                      |
| <b>Authors/ conclusion and interpretations</b>            |             |                       |                                                                                                                          |                                              |
| Authors' conclusions                                      | Text        | Free-text description | As reported                                                                                                              | Please, report the information if applicable |
| Authors' considerations of study limitations              | Text        | Free-text description | As reported                                                                                                              | Please, report the information if applicable |
| Results compared with those of other economic evaluations | Text        | Free-text description | As reported                                                                                                              | Please, report the information if applicable |

**Table 1.1** Measurement of costs and consequences in economic evaluation

| Type of study               | Measurement / valuation of costs in both alternatives | Identification of consequences                                                            | Measurement/ valuation of consequences                                                                  |
|-----------------------------|-------------------------------------------------------|-------------------------------------------------------------------------------------------|---------------------------------------------------------------------------------------------------------|
| Cost analysis               | Monetary units                                        | None                                                                                      | None                                                                                                    |
| Cost-effectiveness analysis | Monetary units                                        | Single effect of interest, common to both alternatives, but achieved to different degrees | Natural units (e.g. life-years gained, disability days saved, points of blood pressure reduction, etc.) |
| Cost-utility analysis       | Monetary units                                        | Single or multiple effects, not necessarily common to both alternatives                   | Healthy years (typically measured as quality-adjusted life-years)                                       |
| Cost-benefit analysis       | Monetary units                                        | Single or multiple effects, not necessarily common to both alternatives                   | Monetary units                                                                                          |

Some types of scaling up effectiveness outcomes (this is **NOT an exhaustive** list, and some items may not be relevant, but these should just work as a conceptual handle):

|                        | <b>Proctor</b>                                                                                                                                                                                                                                                                                                                                                                                                                                                                                                                                                       | <b>Milat</b>                                                                                                                                                                                                                                                                                                                                                                                                                                                                                                                                                                                                                                                                                                                                                                                                                                                      |
|------------------------|----------------------------------------------------------------------------------------------------------------------------------------------------------------------------------------------------------------------------------------------------------------------------------------------------------------------------------------------------------------------------------------------------------------------------------------------------------------------------------------------------------------------------------------------------------------------|-------------------------------------------------------------------------------------------------------------------------------------------------------------------------------------------------------------------------------------------------------------------------------------------------------------------------------------------------------------------------------------------------------------------------------------------------------------------------------------------------------------------------------------------------------------------------------------------------------------------------------------------------------------------------------------------------------------------------------------------------------------------------------------------------------------------------------------------------------------------|
| <b>Acceptability</b>   | Acceptability= perception that an intervention (scaling up strategy) is acceptable, palatable and satisfactory                                                                                                                                                                                                                                                                                                                                                                                                                                                       | Milat ties it to reach → meaning the likely reach and acceptability of the intervention for the targeted population                                                                                                                                                                                                                                                                                                                                                                                                                                                                                                                                                                                                                                                                                                                                               |
| <b>Adoption</b>        | Adoption is defined as the intention, initial decision, or action to try or employ an innovation or evidence-based practice. Adoption also may be referred to as “uptake.”                                                                                                                                                                                                                                                                                                                                                                                           | Adoption is the proportion of settings, practices or organisations that adopt an intervention.                                                                                                                                                                                                                                                                                                                                                                                                                                                                                                                                                                                                                                                                                                                                                                    |
| <b>Appropriateness</b> | Appropriateness is the perceived fit, relevance, or compatibility of the innovation or evidence-based practice for a given practice setting, provider, or consumer; and/or perceived fit of the innovation to address a particular issue or problem. The construct “appropriateness” is deemed important for its potential to capture some “pushback” to implementation efforts, as is seen when providers feel a new program is a “stretch” from the mission of the health care setting, or is not consistent with providers’ skill set, role, or job expectations. | Milat does not explain this in the context of scaling up but does mention it.                                                                                                                                                                                                                                                                                                                                                                                                                                                                                                                                                                                                                                                                                                                                                                                     |
| <b>Feasibility</b>     | The extent to which a new treatment, or an innovation, can be successfully used or carried out within a given agency or setting                                                                                                                                                                                                                                                                                                                                                                                                                                      | Mentioned by Milat but not explained.                                                                                                                                                                                                                                                                                                                                                                                                                                                                                                                                                                                                                                                                                                                                                                                                                             |
| <b>Fidelity</b>        | Fidelity is defined as the degree to which an intervention was implemented as it was prescribed in the original protocol or as it was intended by the program developers.                                                                                                                                                                                                                                                                                                                                                                                            | Effects of interventions are likely to be smaller as they are scaled up; therefore, relatively large effect sizes should be demonstrated in the efficacy stage if an acceptable level of effect is to be maintained when interventions are scaled up. <sup>4</sup> This reduction in effect is in part because of difficulties maintaining the dose and fidelity of the original intervention in real-world settings. It is rare for interventions to remain unchanged as they are scaled up, because of the need to adapt them to suit the local context and the organisational, financial and human resources available for scaling up. <sup>4,6,10</sup> These adaptations may reduce effectiveness, but they can improve acceptability and efficiency, highlighting the importance of measuring intervention effectiveness throughout the scaling up process. |
| <b>Penetration</b>     | Is defined as the integration of a practice within a service setting and its subsystems. (...) Penetration also can be calculated in terms of the                                                                                                                                                                                                                                                                                                                                                                                                                    |                                                                                                                                                                                                                                                                                                                                                                                                                                                                                                                                                                                                                                                                                                                                                                                                                                                                   |

|                       |                                                                                                                                                          |                                                                                                            |
|-----------------------|----------------------------------------------------------------------------------------------------------------------------------------------------------|------------------------------------------------------------------------------------------------------------|
|                       | number of providers who deliver a given service or treatment, divided by the total number of providers trained in or expected to deliver the service.    |                                                                                                            |
| <b>Sustainability</b> | is defined as the extent to which a newly implemented treatment is maintained or institutionalized within a service setting's ongoing, stable operations |                                                                                                            |
| <b>Reach</b>          |                                                                                                                                                          | Reach refers to the level of individual participation of an intended target population in an intervention. |

For peer review only
